# Supplementary material for: Morphogenesis and development of human telencephalic organoids in the absence and presence of exogenous extracellular matrix
Source: PubMed Central journal article supplement (PMC10646563; doi:10.15252/embj.2022113213), 2023-10-16
Supplement: EMBJ-42-e113213-s004.pdf [file EMBJ-42-e113213-s004.pdf]

## Appendix

|                           |    |
|---------------------------|----|
| Appendix Figure S1 .....  | 2  |
| Appendix Figure S2 .....  | 3  |
| Appendix Figure S3 .....  | 4  |
| Appendix Figure S4 .....  | 5  |
| Appendix Figure S5 .....  | 6  |
| Appendix Figure S6 .....  | 7  |
| Appendix Figure S7 .....  | 8  |
| Appendix Figure S8 .....  | 9  |
| Appendix Figure S9 .....  | 10 |
| Appendix Figure S10 ..... | 11 |
| Appendix Figure S11 ..... | 12 |
| Appendix Figure S12 ..... | 13 |
| Appendix Figure S13 ..... | 14 |
| Appendix Figure S14 ..... | 15 |
| Appendix Figure S15 ..... | 16 |
| Appendix Figure S16 ..... | 17 |
| Appendix Table S1 .....   | 18 |
| Appendix Table S2 .....   | 21 |
| Appendix Table S3 .....   | 22 |

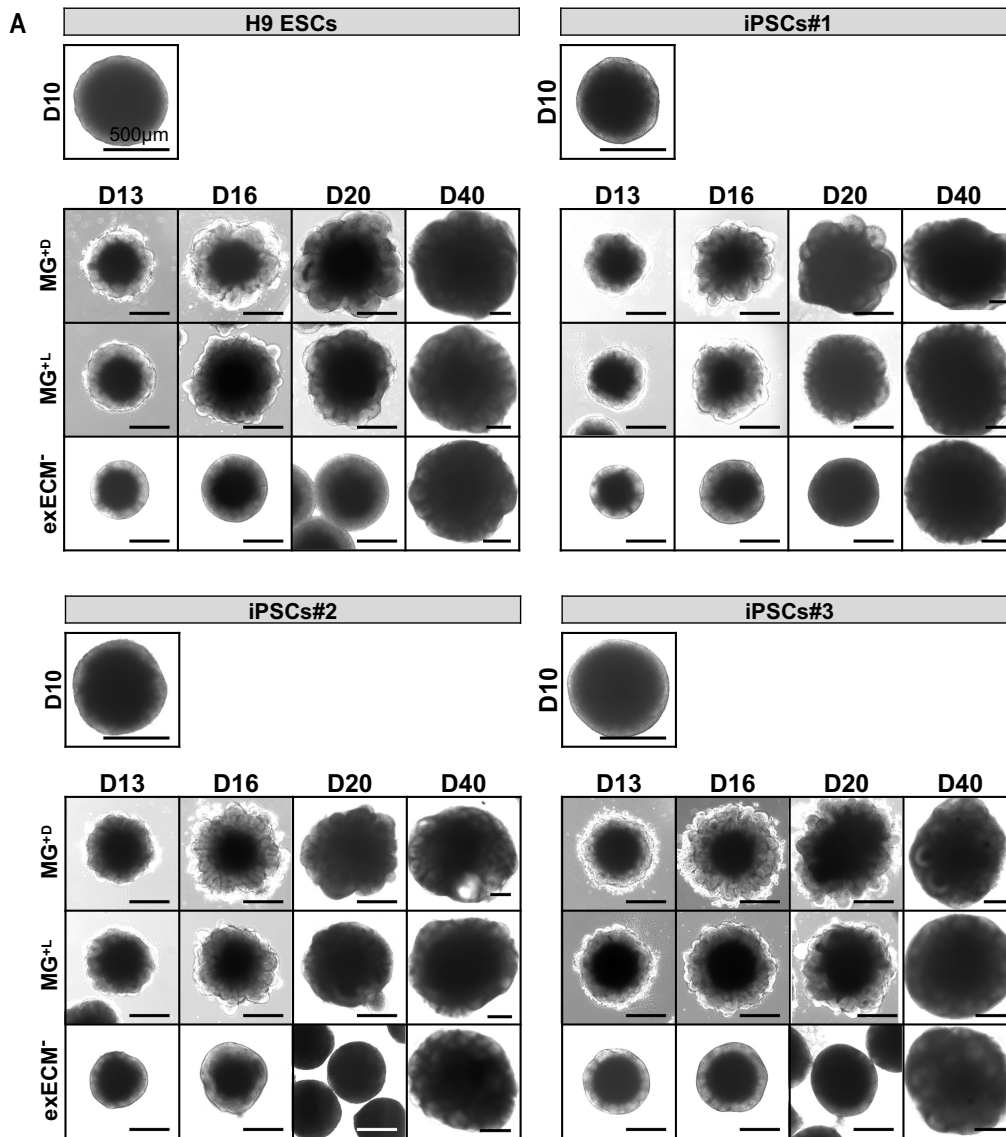

**B**

| Imaging + size measurement |                     | H9 ESCs |         |     | iPSCs#1 |    |     | iPSCs#2 |    |     | iPSCs#3 |    |     | Total |
|----------------------------|---------------------|---------|---------|-----|---------|----|-----|---------|----|-----|---------|----|-----|-------|
| Day                        | Batches / Organoids | +D      | +L      | (-) | +D      | +L | (-) | +D      | +L | (-) | +D      | +L | (-) |       |
|                            |                     | Day 10  | Batches | 2   |         |    | 2   |         |    | 3   |         |    | 5   |       |
| Organoids                  | 12                  |         |         |     | 12      |    |     | 17      |    |     | 34      |    |     |       |
| Day 13                     | Batches             | 2       | 2       | 2   | 2       | 2  | 2   | 2       | 3  | 3   | 5       | 5  | 5   | 323   |
|                            | Organoids           | 14      | 40      | 10  | 13      | 28 | 13  | 21      | 43 | 15  | 37      | 63 | 26  |       |
| Day 16                     | Batches             | 2       | 2       | 2   | 2       | 2  | 2   | 3       | 3  | 3   | 5       | 5  | 5   | 316   |
|                            | Organoids           | 14      | 38      | 10  | 13      | 20 | 14  | 20      | 30 | 23  | 39      | 61 | 34  |       |
| Day 20                     | Batches             | 2       | 2       | 2   | 2       | 2  | 2   | 3       | 3  | 3   | 5       | 5  | 5   | 348   |
|                            | Organoids           | 12      | 28      | 35  | 8       | 12 | 15  | 18      | 23 | 38  | 38      | 66 | 55  |       |

**Appendix Figure S1.** (Related to Fig. 1B-C) **Organoid morphology at D10, D13, D16, D20, and D40 evolves in comparable ways in all cell lines.** (A) Morphological changes that are comparable across cell lines include outer brightening at D10, tissue budding in MG<sup>+D</sup> and MG<sup>+L</sup> conditions from D16, and formation of neural rosettes across conditions at D40. Scale bars: 500  $\mu$ m. Images of H9 ESCs and D20 and D40 timepoints are as in Fig.1B. (B) Number of organoids (technical replicates) and batches (biological replicates) used for the measurement of organoid diameter across timepoints (Fig. 1C).

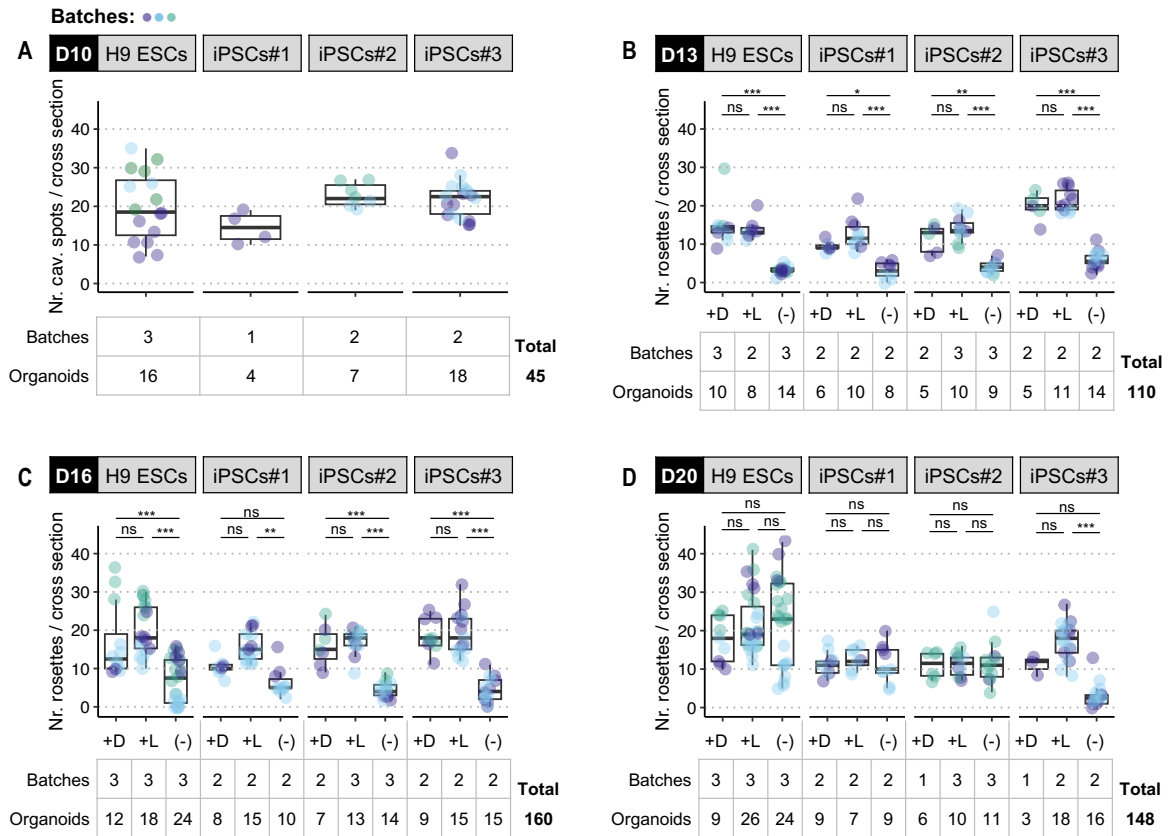

**Appendix Figure S2.** (Related to Fig. 2B and 2F) **Number of organoids and batches used to quantify the number of cavitation spots and neural rosettes from D10 to D20.** (A) Cavitation spots at D10. Neural rosettes at D13 (B), D16 (C), and D20 (D). Boxplots mark the median value; the two hinges correspond to the first and third quartiles (the 25th and 75th percentiles); and the whiskers extend from the hinge to the highest/lowest value no further than  $1.5 \times \text{IQR}$  from the hinge (where IQR is the inter-quartile range, or distance between the first and third quartiles). Each datapoint is an individual organoid (technical replicate); datapoint colors indicate organoid batches (biological replicates). Statistical tests are analysis of variance (ANOVA);  $0 \leq p < 0.001$ , \*\*\*;  $0.001 \leq p < 0.01$ , \*\*;  $0.01 \leq p < 0.05$ , \*;  $p \geq 0.05$ , ns (see results of statistical tests in **Appendix Table S1**). The tables indicate the number of organoids (technical replicates) and batches (biological replicates) used in these analyses.

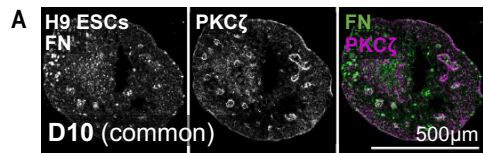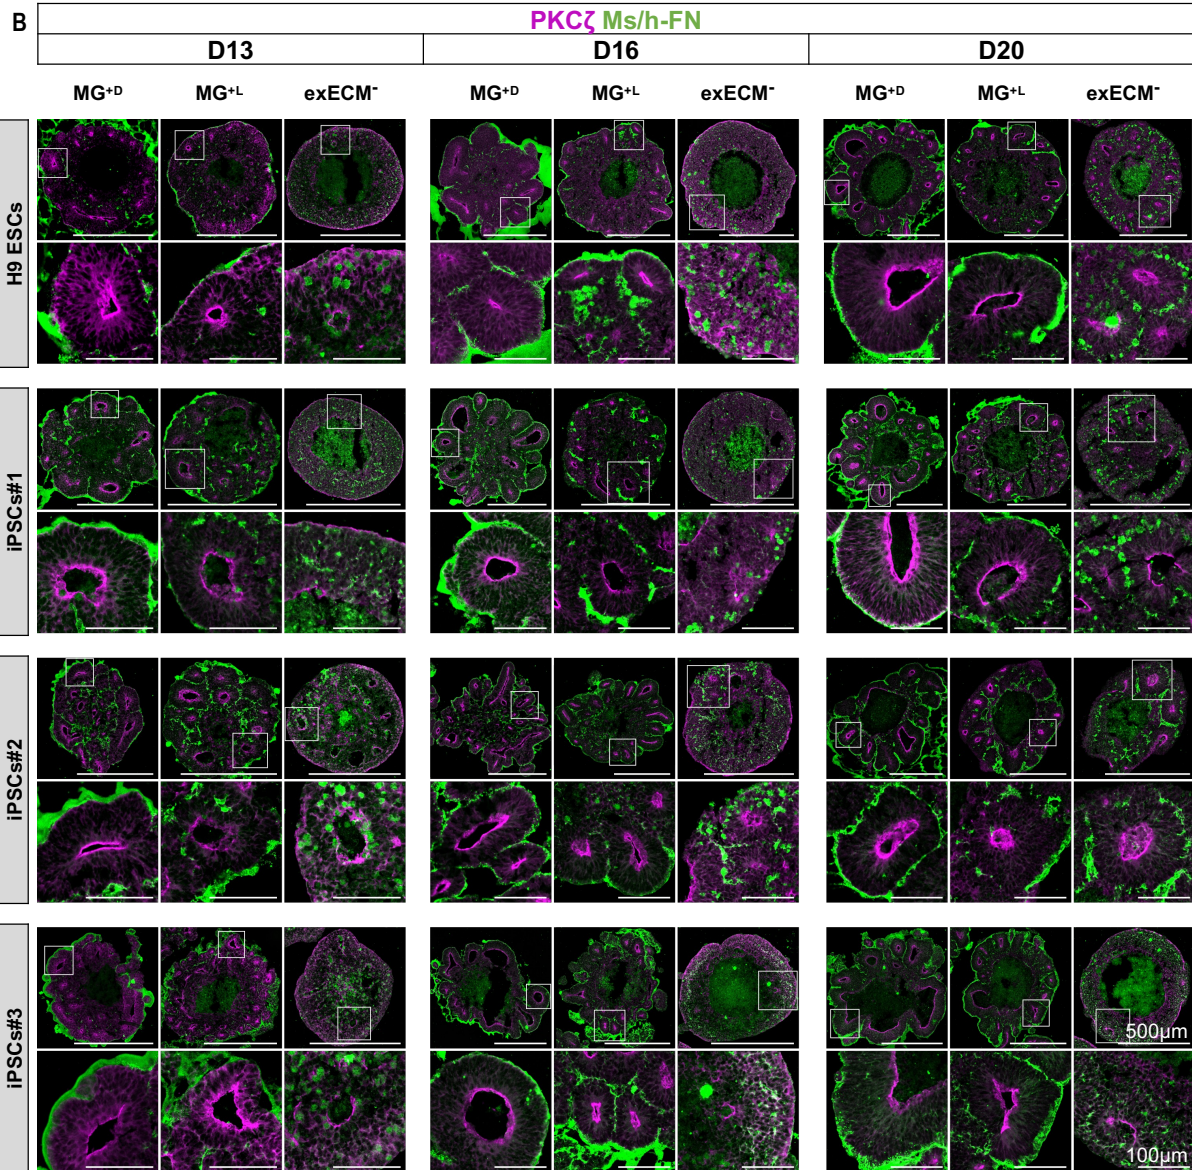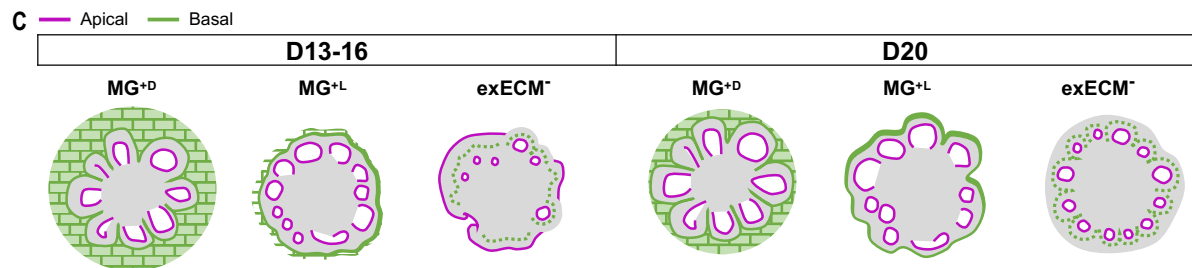

**Appendix Figure S3.** (Related to Fig. 2G) Comparison of the distribution of polarity proteins at D10 (A) and D13-D20 (B) shows the quick action of Matrigel on tissue morphogenesis. Apical and basal domains are marked by PKCζ and FN, respectively. Bottom panels: magnification of inset. Whole-organoid images of H9 ESCs at D20 are as in Fig.2G. (C) Schematic representation of tissue morphogenesis from D13 to D20. An apical-in/basal-out polarity axis is defined at D13-D16 in MG<sup>+D</sup> and MG<sup>+L</sup> organoids, but still undefined in most exECM<sup>-</sup> organoids. At D20, an apical-in/basal-out polarity axis is defined in all conditions.

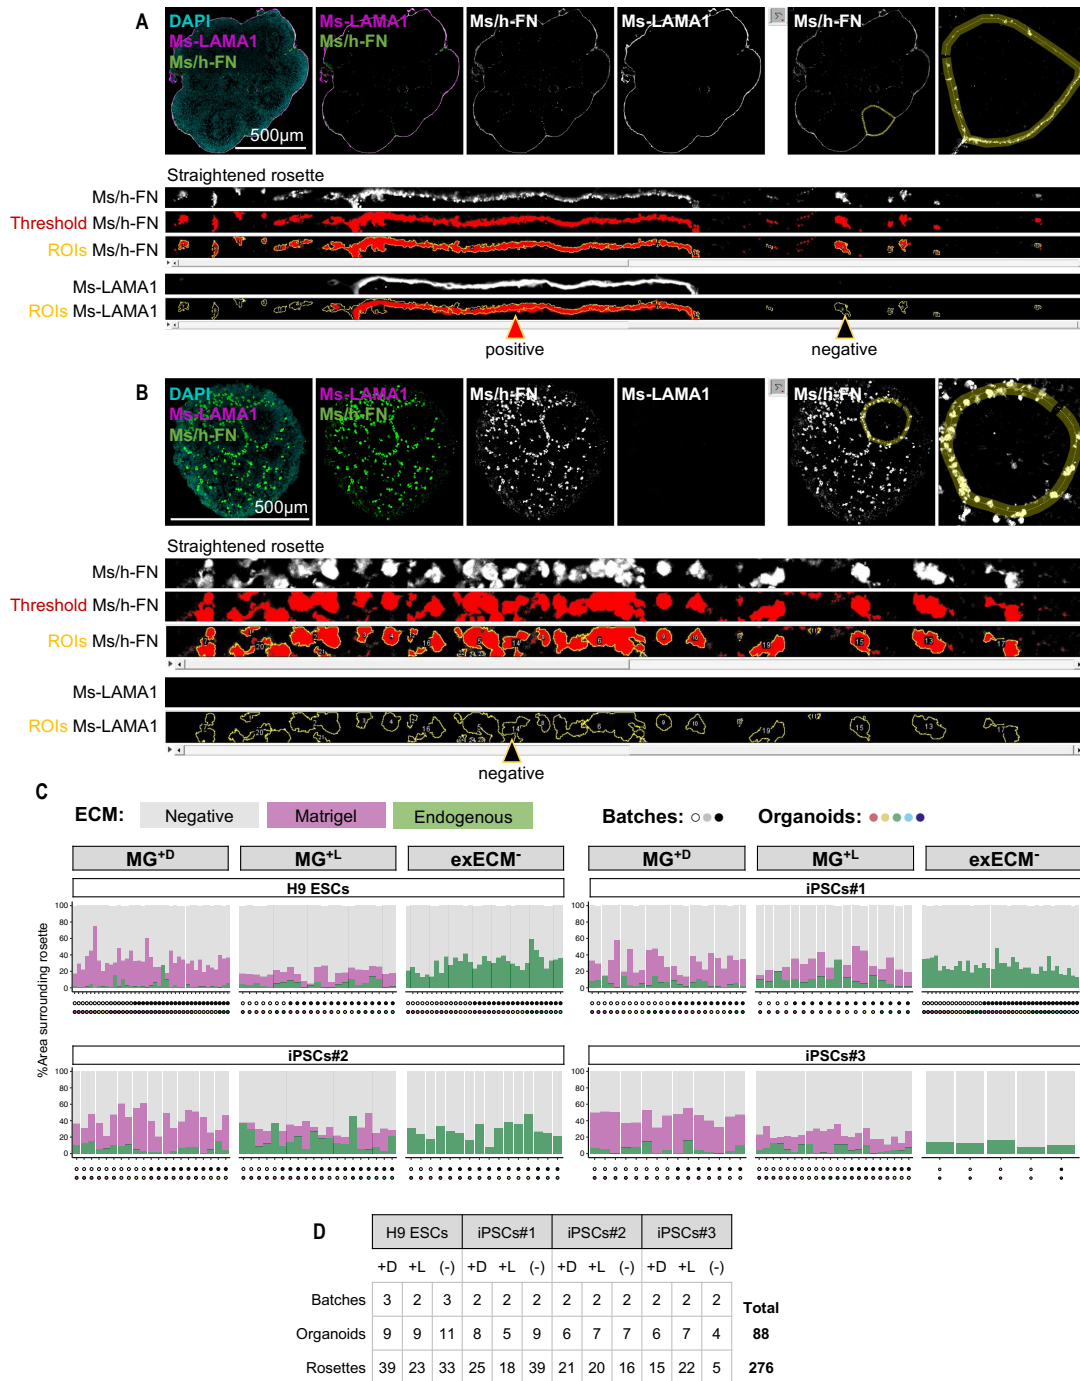

**Appendix Figure S4.** (Related to Fig. 2H-I) **Quantification of the area surrounding neural rosettes covered by endogenous or exogenous ECM.** (A-B) Co-staining of Ms-LAMA1 (Matrigel-derived) and Ms/h-FN (Matrigel or endogenously derived). Exemplary output of the method in one MG<sup>+D</sup> (A) and one exECM<sup>-</sup> organoid (B) (details in **Materials and Methods**). Briefly, the outside region of individual neural rosettes was segmented with a 15.6 $\mu$ m-thick band (50 pixels, “Segmented line” tool in Fiji) and straightened (“Straighten” tool in Fiji). In the Ms/h-FN channel, which represents both endogenous and exogenous ECM, the following commands were performed: 1) definition of an intensity threshold (“Threshold” command, method: triangle); 2) detection of positive areas and generation of regions of interest (ROIs) (“Analyze Particles” command in Fiji). In both channels, ROIs were defined as positive (red arrowheads) or negative (black arrowheads) based on the percentage of positive area. The two organoids shown here are as in **Fig.2H**. (C) Percentage of area covered by Matrigel-derived (Ms-LAMA1<sup>+</sup>Ms/h-FN<sup>+</sup>) or endogenously derived (Ms-LAMA1<sup>+</sup>Ms/h-FN<sup>+</sup>) ECM, or by negative staining, for each single rosette analyzed. (D) Number of rosettes, organoids (technical replicates), and batches (biological replicates) used for this quantification.

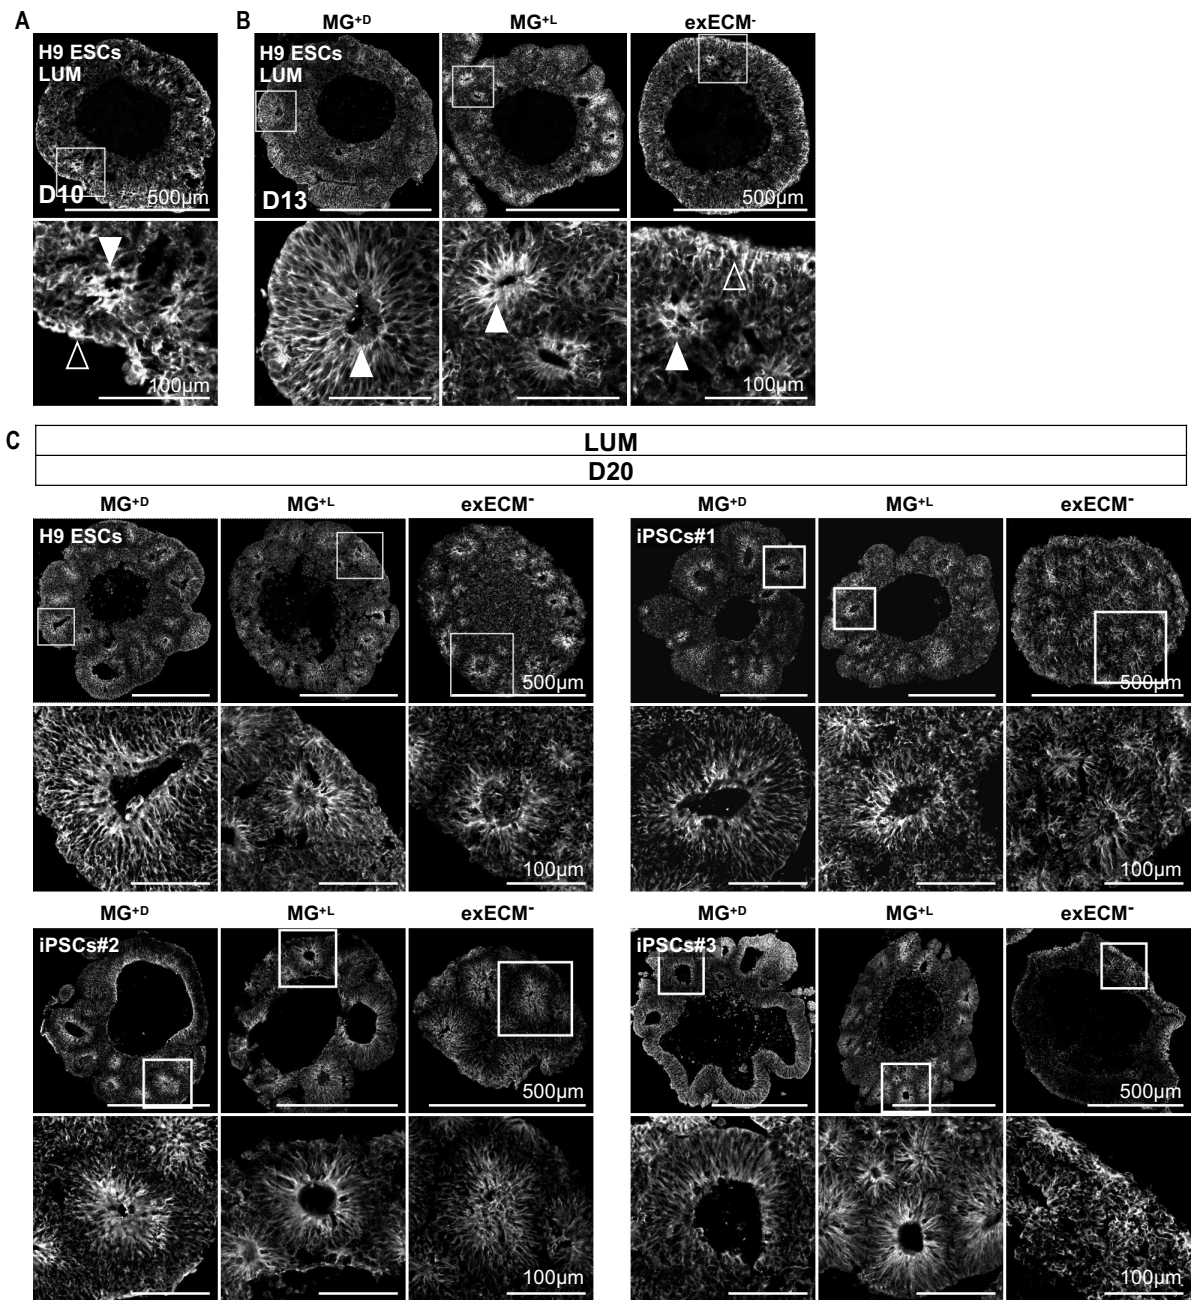

**Appendix Figure S5.** (Related to Fig. 2) **Lumican is endogenously produced by NPCs in all conditions.** (A) At D10, LUM is abundantly expressed but presents disorganized tissue distribution. Apical localization to rosette ventricular zones is defined at D13 in MG<sup>+D</sup> and MG<sup>+L</sup> organoids (B) and at D20 in all conditions (C). Arrowheads mark the location of LUM lining the organoid outer surface (empty arrowheads) or the ventricular zone of neural rosettes within the tissue (white arrowheads). Bottom panels: magnification of inset.

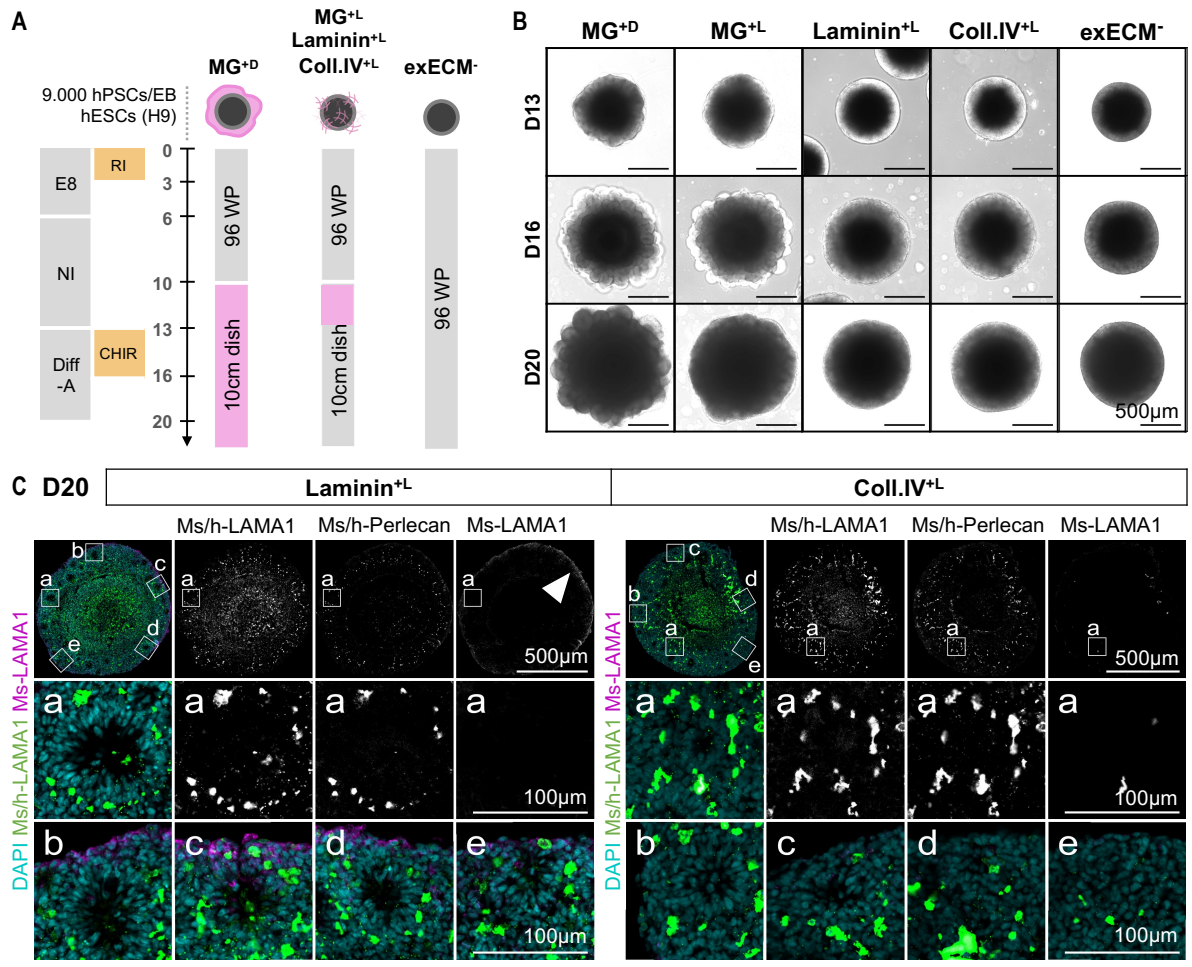

**Appendix Figure S6.** (Related to Fig. 2J-K) **Exposure to purified Laminin of Collagen IV does not have the same effect on organoid morphogenesis as exposure to Matrigel.** **(A)** Experimental paradigm to test the effect of liquid embedding with purified Laminin or Collagen IV on organoid development. **(B)** Brightfield imaging of organoids from the same batch exposed to the five different experimental conditions, at D13, D16, and D20. Images of Laminin<sup>+L</sup> and Coll.IV<sup>+L</sup> organoids at D20 are as in **Fig.2K**. **(C)** Co-staining of Ms-LAMA1, Ms/h-LAMA1, and Ms/h-Perlecan in Laminin<sup>+L</sup> and Coll.IV<sup>+L</sup> organoids at D20. Note the accumulation of Ms-LAMA1 at the organoid surface in Laminin<sup>+L</sup> conditions (white arrowhead; zoom-in in **Cb-Ce**). Whole-organoid composite images are as in **Fig.2K**.

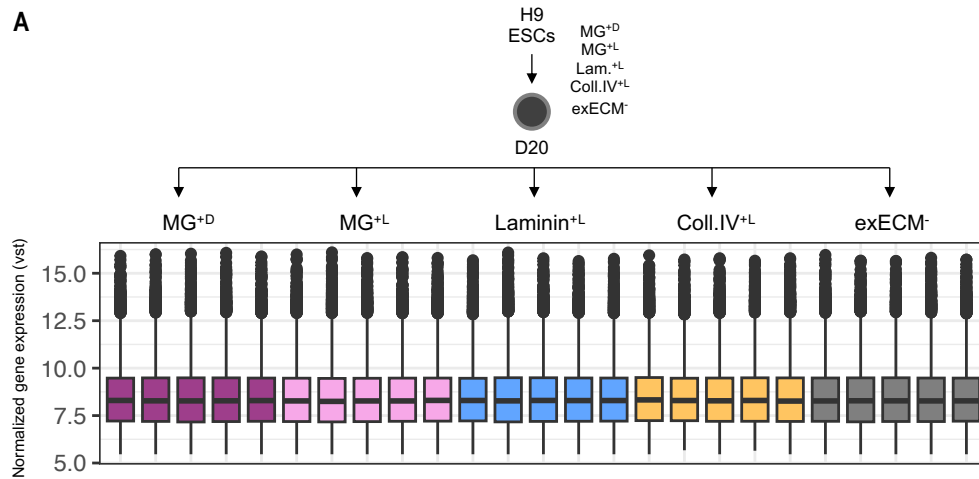

**B** DE genes: all pairwise comparisons

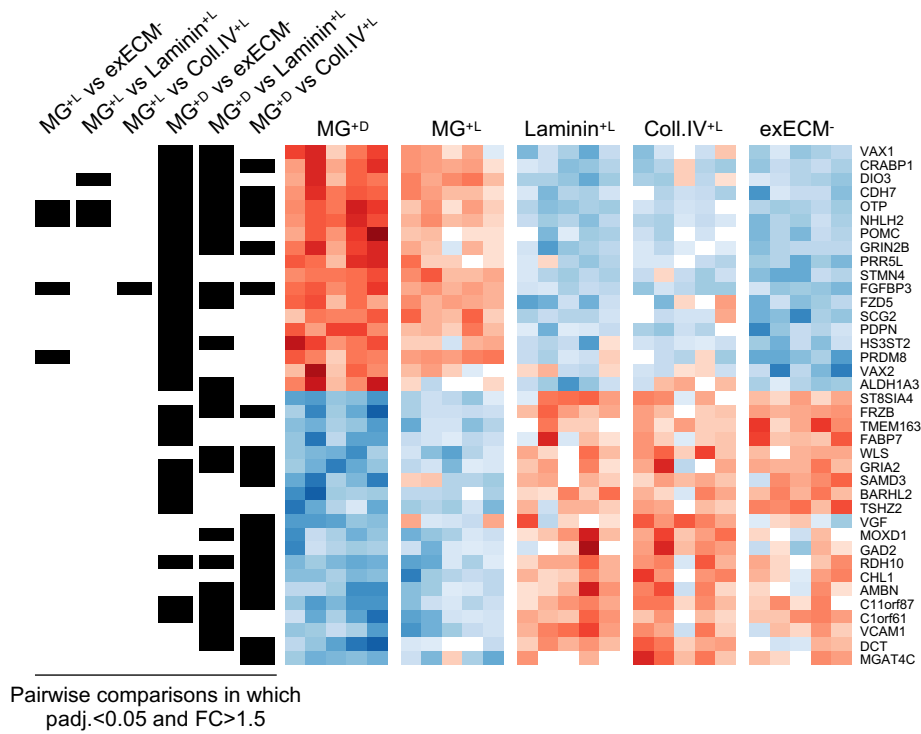

**Appendix Figure S7.** (Related to Fig. 3) **Bulk RNA sequencing analysis of organoids at D20.** (A) Experimental paradigm and normalized gene expression (after variance stabilizing transformation, vst) of each of the 25 analyzed organoids. (D) Normalized (vst) and row-scaled expression levels of genes found differentially expressed (adjusted p value,  $p_{adj}$ , below 0.05 and fold change, FC, above 1.5) considering all pairwise comparisons between single experimental conditions.



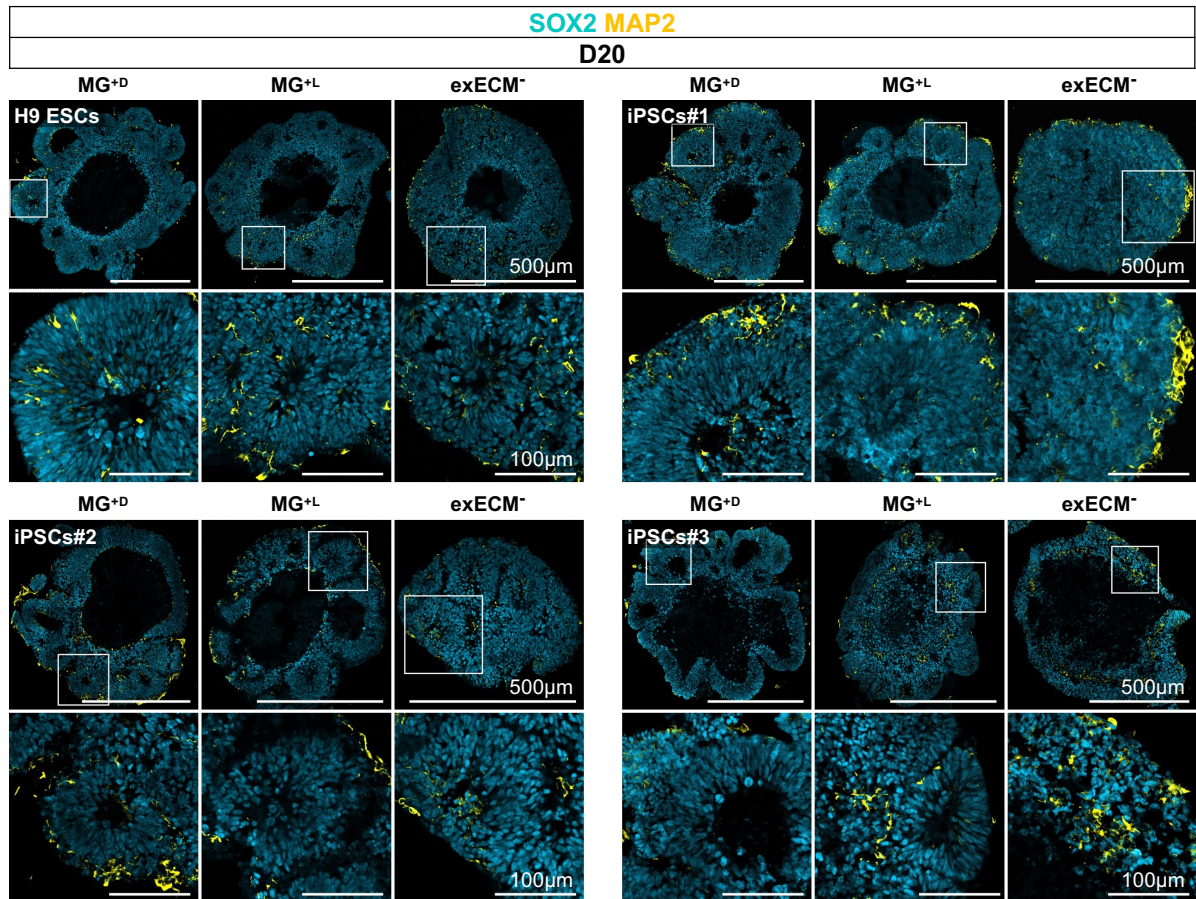

**Appendix Figure S8.** (Related to Fig. 3B) **The onset of neurogenesis occurs at around D20.** At D20, few scattered neurons (MAP2<sup>+</sup>) are seen mainly at the outer organoid surface or surrounding neural rosettes (SOX2<sup>+</sup>), in all conditions and cell lines. Bottom panels: magnification of inset. Images of H9 ESCs are as in **Fig.3B**.

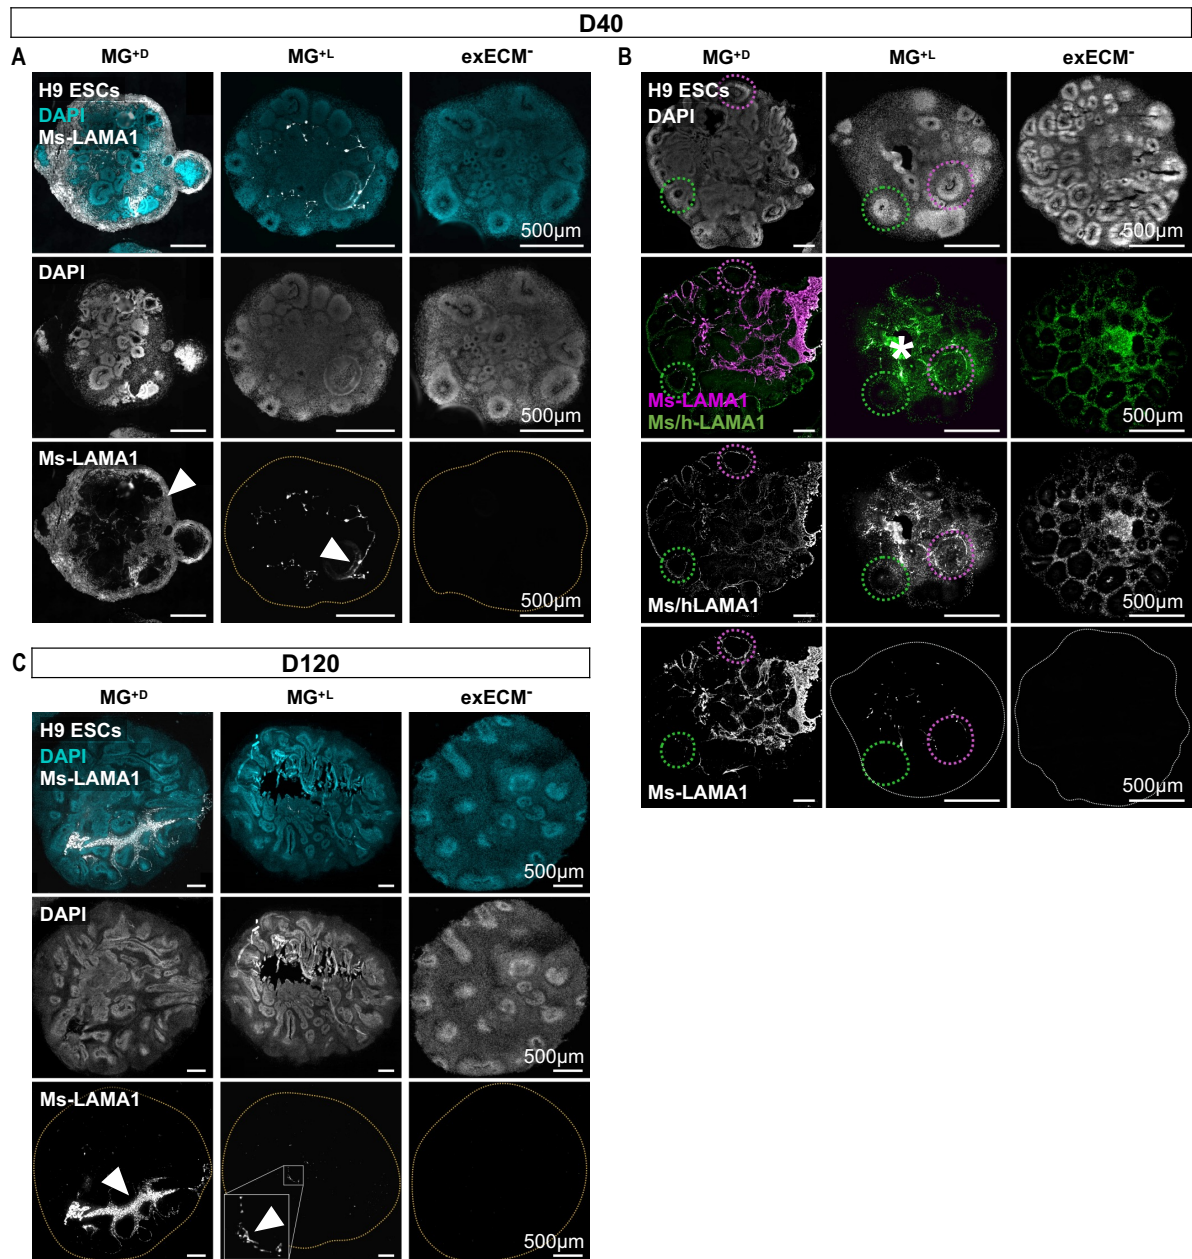

**Appendix Figure S9.** (Related to Fig. 4 and 5) **Matrigel shows long-term permanence within the organoid tissue.** **(A)** At D40, MG<sup>+D</sup> organoids remain encapsulated by Matrigel (white arrowhead); and Matrigel remnants are visible within the tissue of MG<sup>+L</sup> organoids (marked by Ms-LAMA1; white arrowhead). **(B)** Co-staining of Ms-LAMA1 and Ms/h-LAMA1 at D40. In MG<sup>+</sup> organoids some neural rosettes are surrounded by Matrigel-derived ECM (Ms-LAMA1<sup>+</sup>; magenta-delimited areas) while others are surrounded by endogenously produced ECM (Ms-LAMA1<sup>-</sup> Ms/h-LAMA1<sup>+</sup>; green-delimited areas). In exECM<sup>-</sup> organoids, there is abundant endogenous production of LAMA1 (Ms/h-LAMA1<sup>+</sup>), which surrounds all neural rosettes. **(C)** At D120, large Ms-LAMA1<sup>+</sup> regions are visible in MG<sup>+D</sup> organoids (white arrowhead), when Matrigel has been engulfed by the growing tissue; and Matrigel remnants are still present in MG<sup>+L</sup> organoids (white arrowhead). ExECM<sup>-</sup> organoids show complete absence of Ms-LAMA1 staining, as expected.

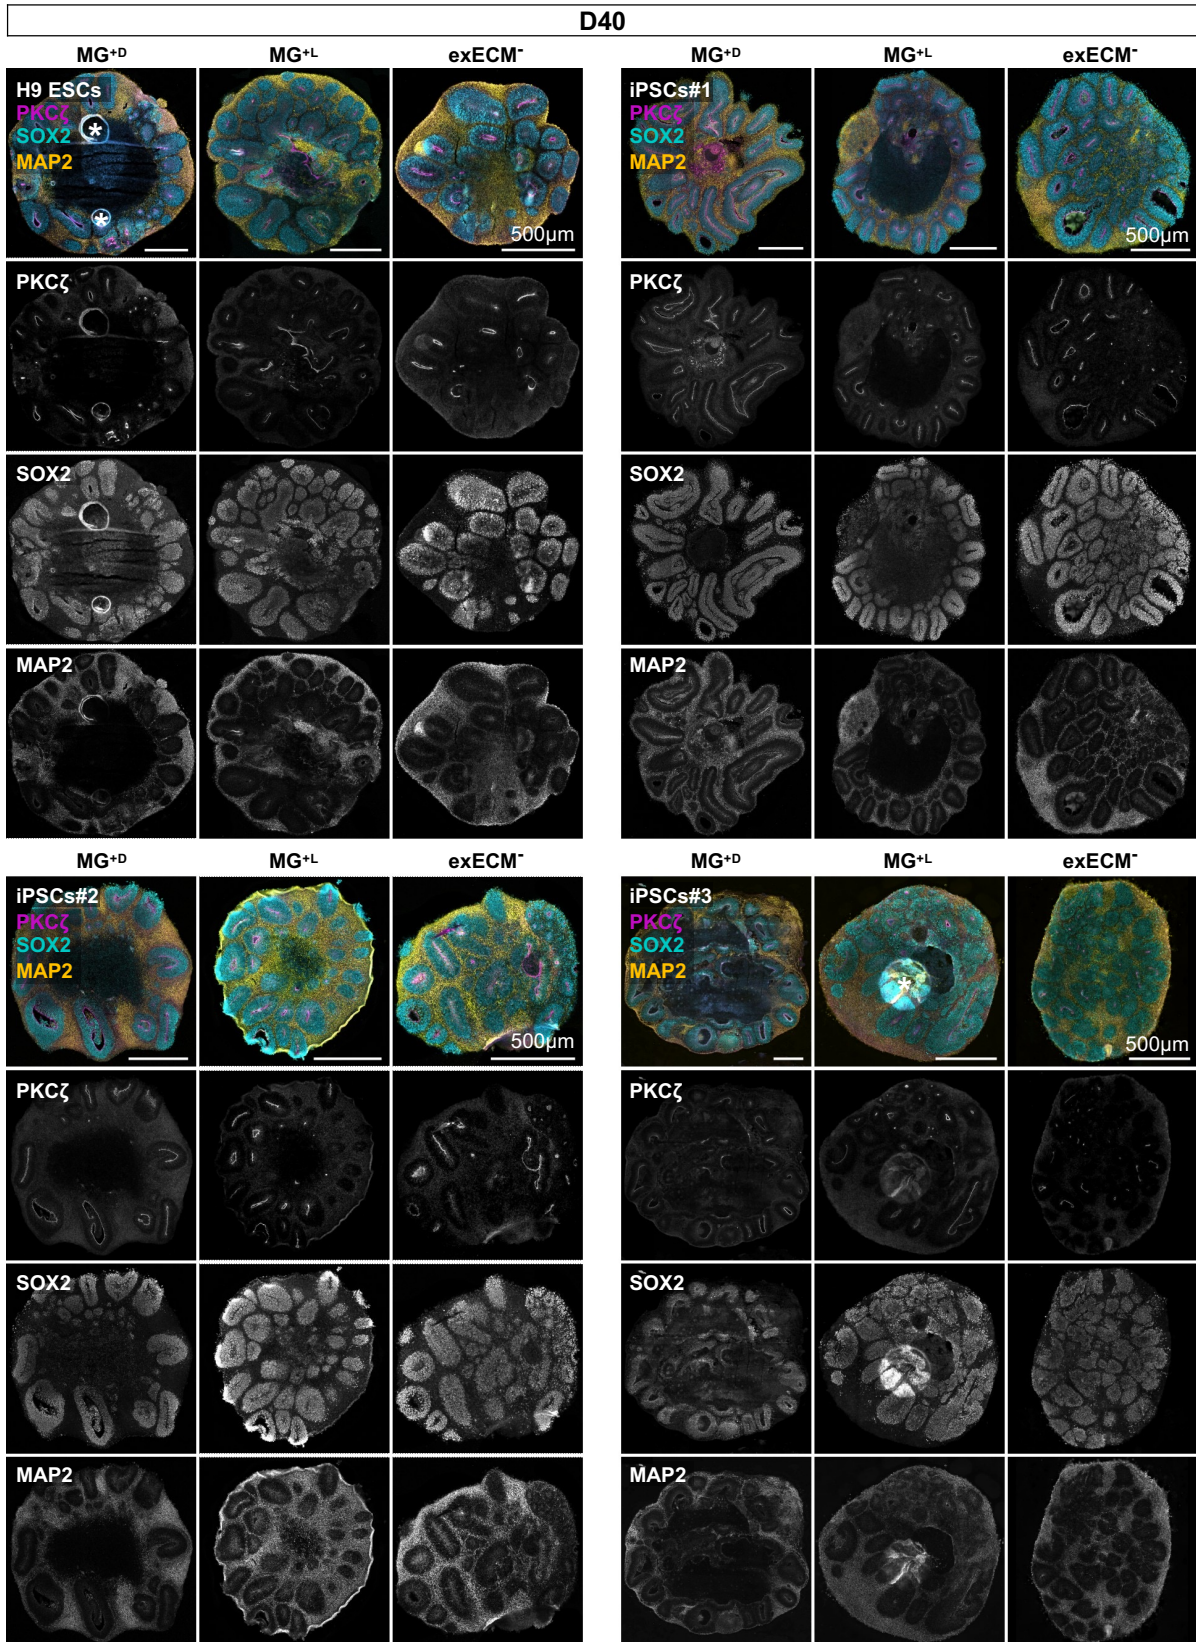

**Appendix Figure S10.** (Related to Fig. 4B) **Organization of neural progenitors and neurons is comparable between conditions at D40.** Organoids from all conditions and cell lines show abundant neural rosettes with PKC $\zeta$ <sup>+</sup> ventricular zone, and inside-out organization of SOX2<sup>+</sup> neural progenitors and MAP2<sup>+</sup> neurons. \*: staining artifact. A zoomed-in view of one rosette of H9 ESC-derived organoids is shown in Fig. 4B.

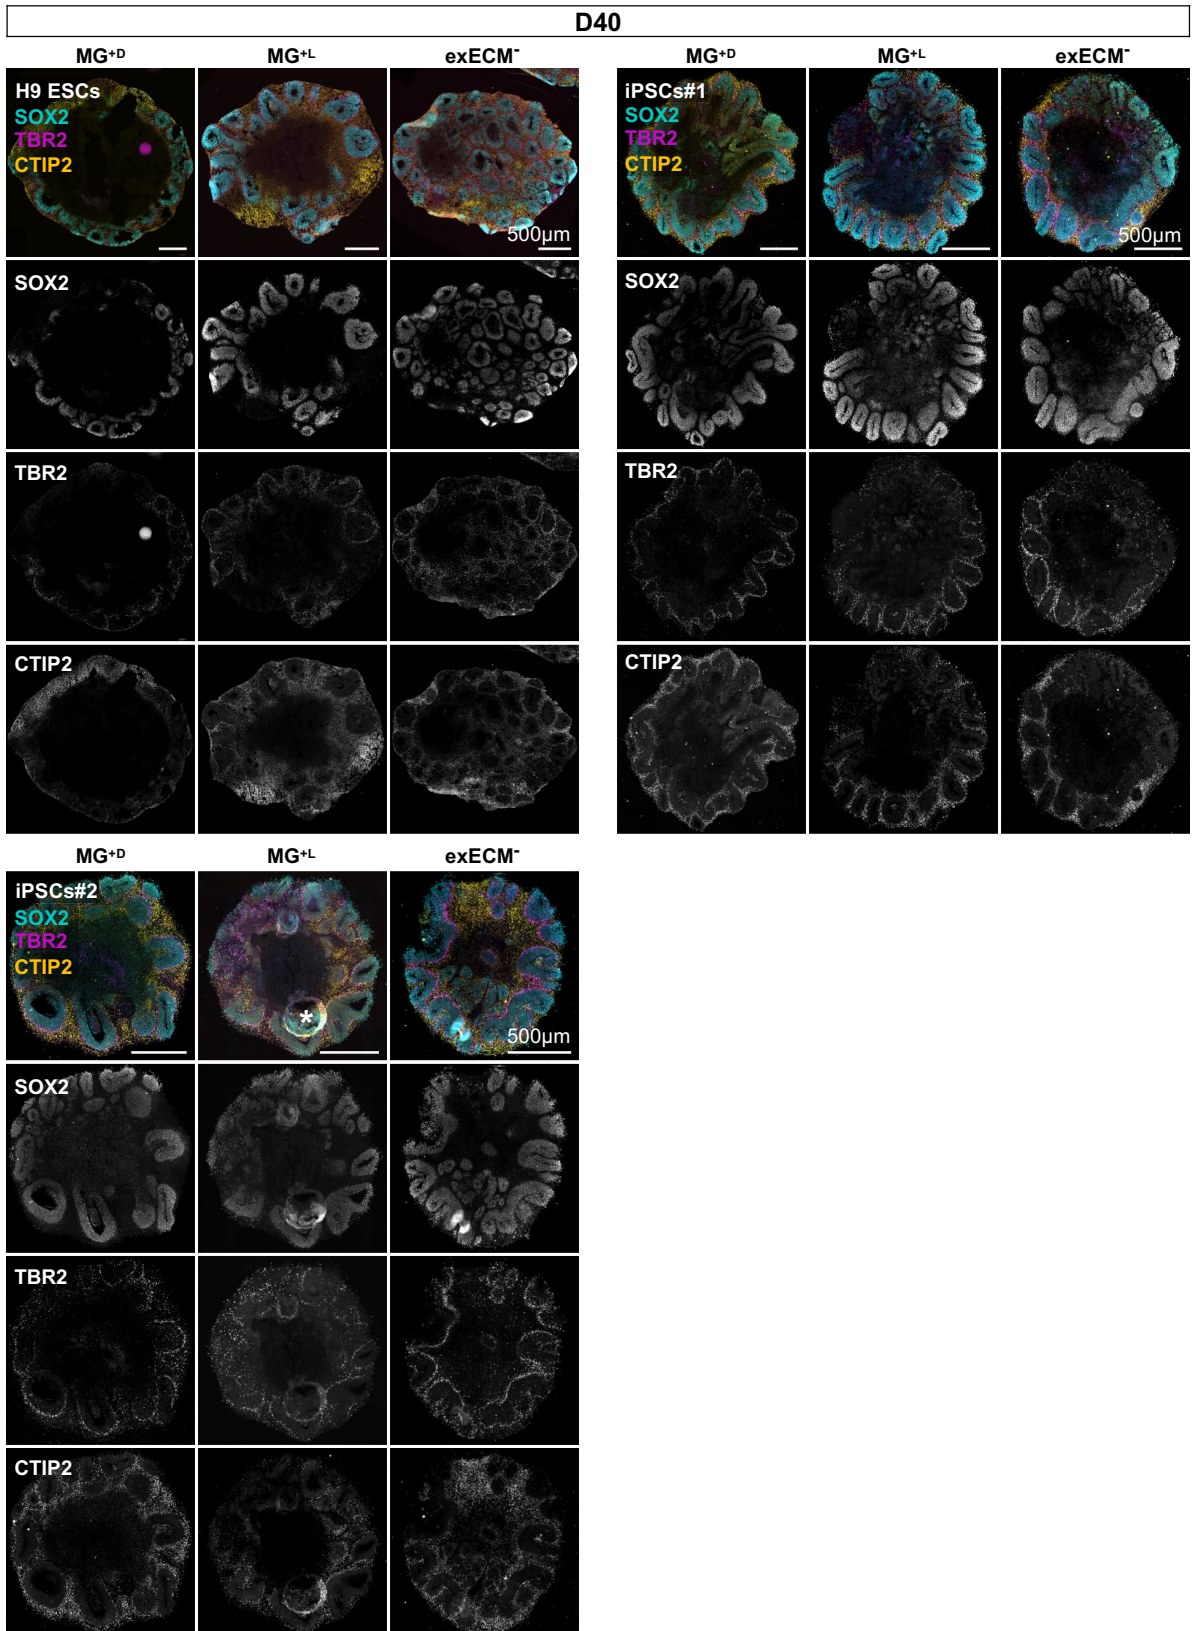

**Appendix Figure S11.** (Related to Fig. 4C) **Tissue identity and organization of dorsal-cortical cell types is comparable between conditions at D40.** Radial glia (SOX2<sup>+</sup>), dorsal intermediate progenitors (TBR2<sup>+</sup>) and early born excitatory neurons (CTIP2<sup>+</sup>) show layered arrangement in neural rosettes of organoids from all conditions and cell lines. \*: staining artifact. A zoomed-in view of one rosette of H9 ESC-derived organoids is shown in **Fig. 4C**.

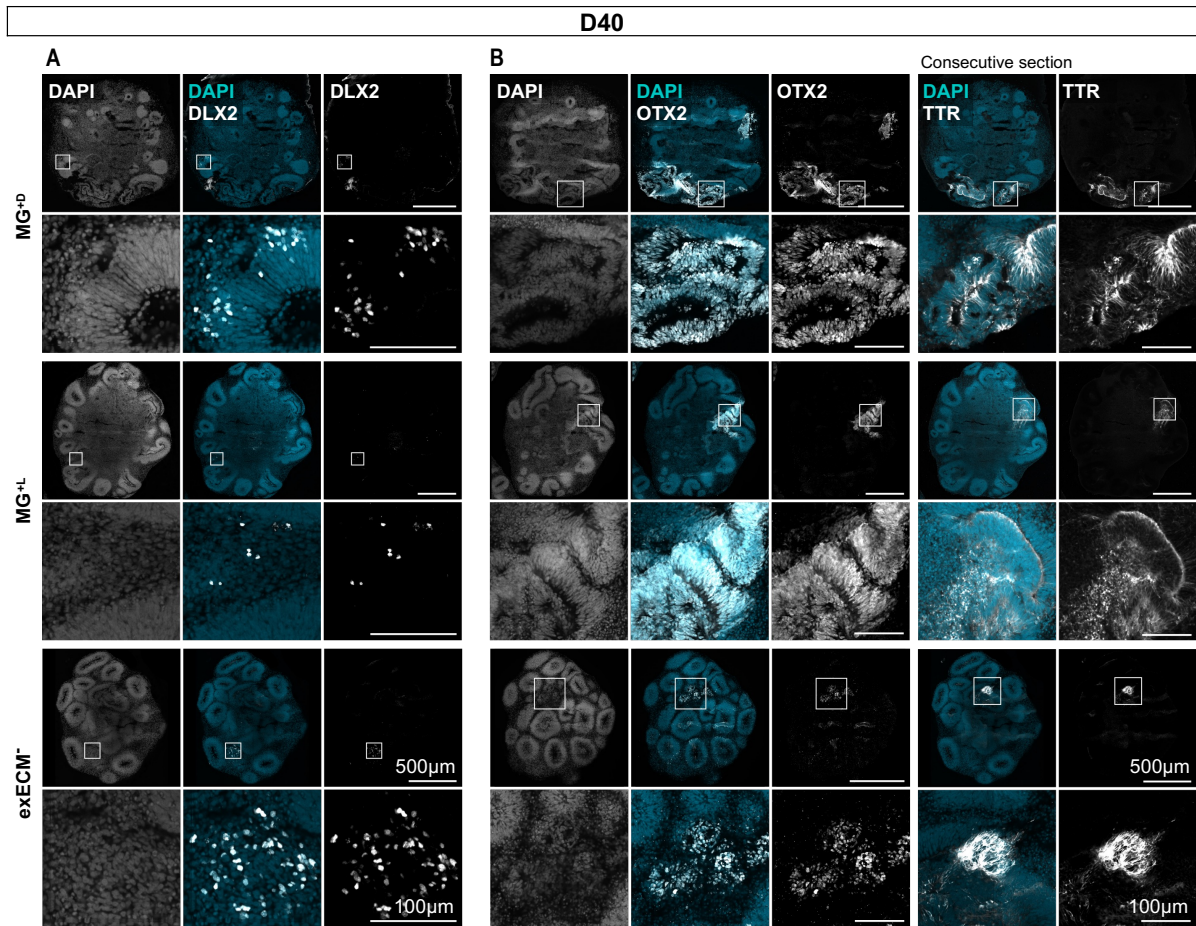

**Appendix Figure S12.** (Related to Fig. 4D and H) **(A)** At D40, few DLX2<sup>+</sup> ventral neural progenitor cells are seen in organoids from all conditions. **(B)** Optic cup-like regions show convoluted morphology and are marked by the expression of OTX2 and TTR (shown in consecutive sections of the same organoid). Bottom panels: magnification of inset. Whole-organoid composite images of DAPI/OTX2 immunostaining are as in **Fig. 4D**.

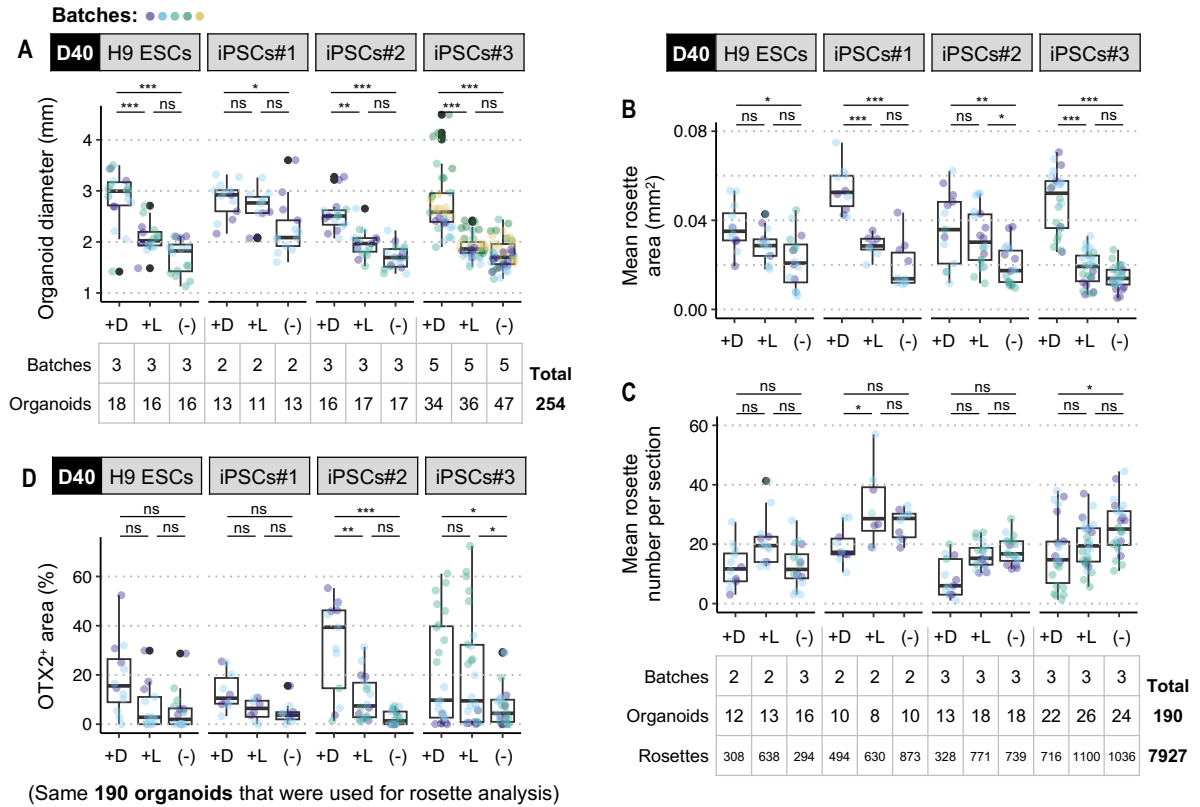

**Appendix Figure S13.** (Related to Fig. 4E-H) **Number of organoids and batches used to quantify rosette metrics and percentage of OTX2<sup>+</sup> tissue at D40.** (A) Organoid diameter. (B) Mean rosette area. (C) Mean rosette number per section. (D) Percentage of OTX2<sup>+</sup> area. Boxplots mark the median value; the two hinges correspond to the first and third quartiles (the 25th and 75th percentiles); and the whiskers extend from the hinge to the highest/lowest value no further than 1.5 \* IQR from the hinge (where IQR is the inter-quartile range, or distance between the first and third quartiles). Each datapoint is an individual organoid (technical replicate); datapoint colors indicate organoid batches (biological replicates). Statistical tests are analysis of variance (ANOVA);  $0 \leq p < 0.001$ , \*\*\*;  $0.001 \leq p < 0.01$ , \*\*;  $0.01 \leq p < 0.05$ , \*;  $p \geq 0.05$ , ns (see results of statistical tests in **Appendix Table S1**). The tables indicate the number of rosettes, organoids (technical replicates), and batches (biological replicates) used in these analyses.

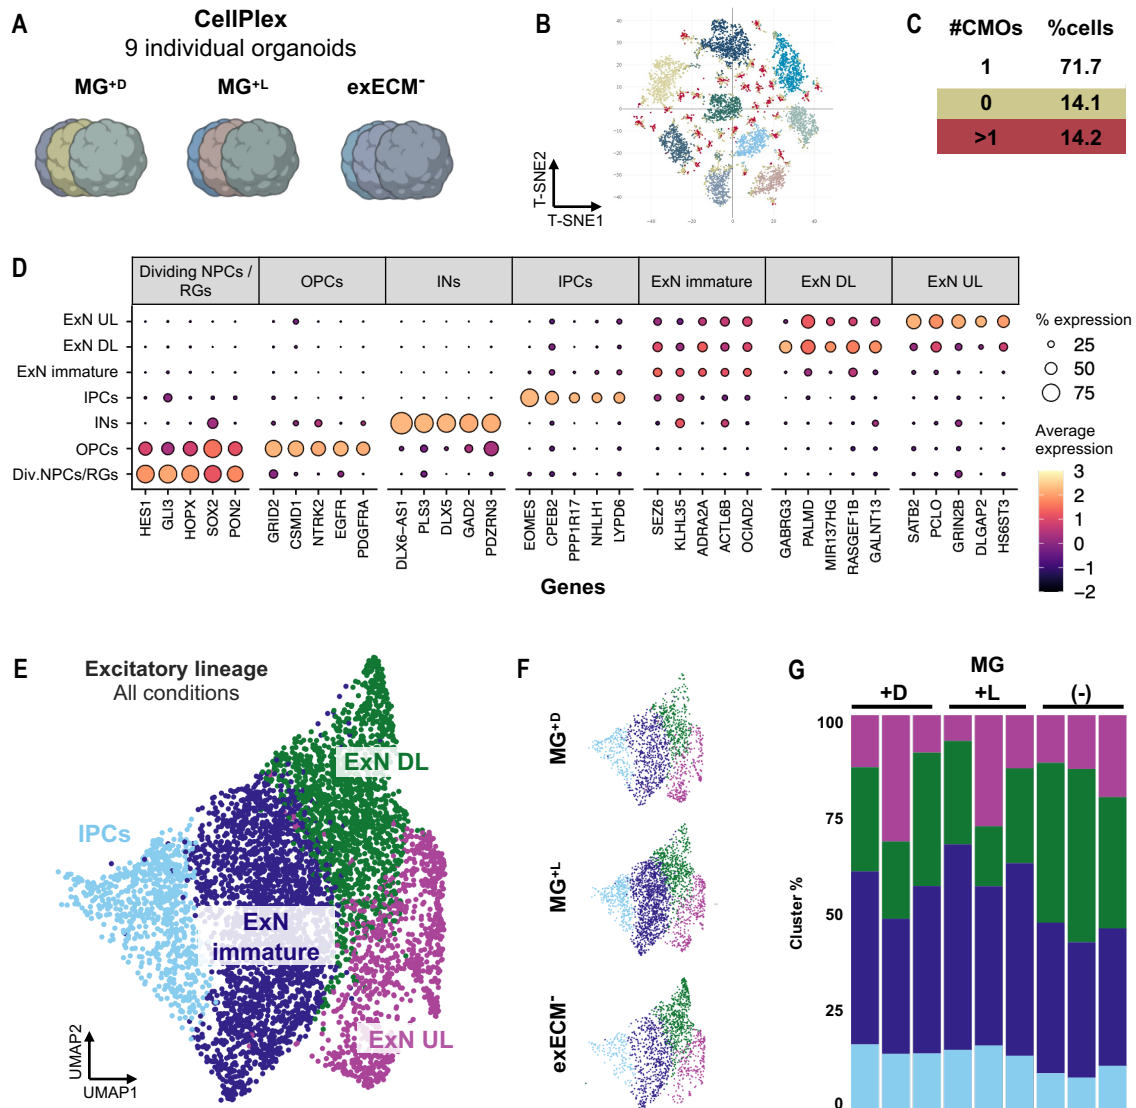

**Appendix Figure S14.** (Related to Fig. 5A-H) **Details of scRNAseq analysis.** **(A)** Nine individual organoids (3 per condition) were multiplexed with unique molecular identifiers (Cell Multiplexing Oligos, CMOs). **(B)** T-SNE projection of cells retrieved after sequencing, based on recovered CMOs. **(C)** Demultiplexing of used CMOs allows the assignment of individual cells to the respective organoid of origin. More than 70% of cells (corresponding to 6714 cells) were assigned to an individual organoid; cells tagged with zero (12.9%) or more than one CMO (15%) were excluded from the downstream analysis. Here, one of two sequenced libraries is shown; in the second library, about 56% of cells (7756 cells) were assigned to a unique CMO. **(D)** Top 5 cluster markers of telencephalic clusters: dividing NPCs/radial glia progenitors (RGs), oligodendrocyte precursor cells (OPCs), interneurons (INs), intermediate progenitor cells (IPCs), immature excitatory neurons (ExN), deep-layer excitatory neurons (ExNs DL), and upper-layer ExNs (ExNs UL). **(E)** Subset of the excitatory neuron lineage in UMAP projection after filtering and exclusion of non-telencephalic clusters; selected clusters: IPCs, immature exNs, deep-layer ExNs and upper-layer ExNs. **(F)** UMAP projection of the same dataset, split by each individual condition. **(G)** Percentage of cells in each cluster of the excitatory neuron lineage, per condition and per organoid.

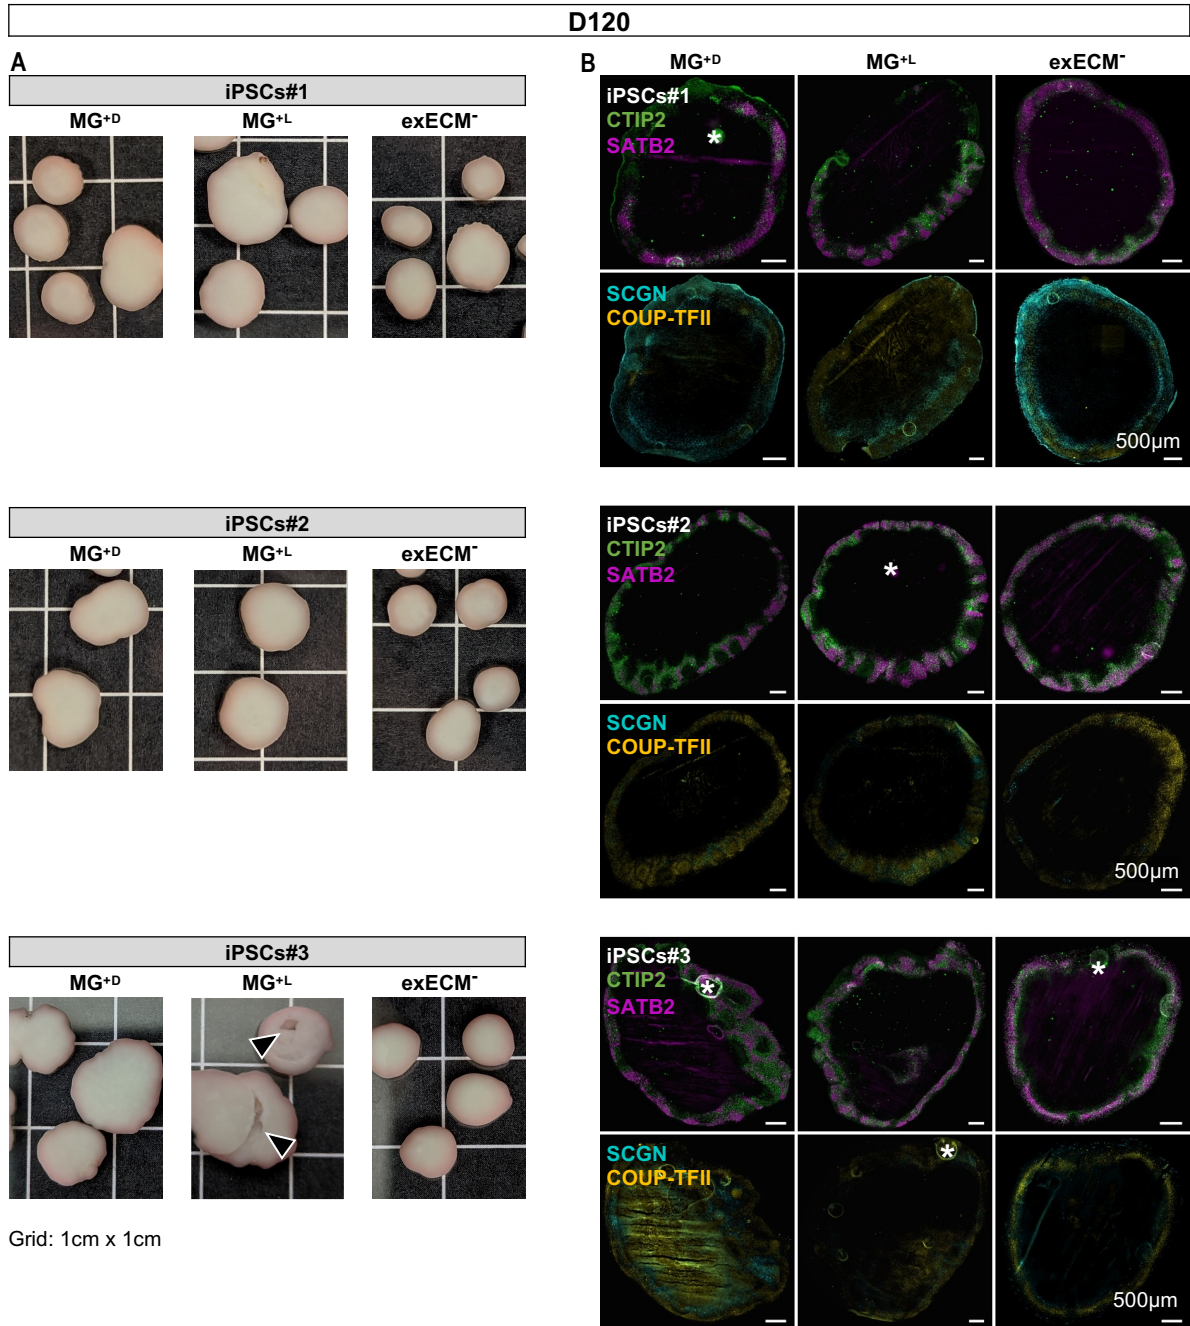

**Appendix Figure S15.** (Related to Fig. 5I) **Organoids cultured for 120 days show size dependent on Matrigel exposure, but comparable cell types and tissue morphology.** (A) Although organoid size is variable at D120, exECM<sup>-</sup> organoids are generally smaller than MG<sup>+D</sup> or MG<sup>+L</sup> organoids. Overgrowth may cause tissue damage, as seen in iPSCs#3-derived MG<sup>+L</sup> organoids (black arrowheads). Grid size: 1cm x 1cm. (B) Tissue immunostaining of organoids at D120 shows abundant deep- and upper-layer neurons (CTIP2<sup>+</sup> and SATB2<sup>+</sup>, respectively), as well as less abundant populations of interneurons (SCGN<sup>+</sup> and COUP-TFII<sup>+</sup>) across all conditions and cell lines. \*: staining artifacts.





**Appendix Table S1. Statistical analyses.** Analysis of variance (ANOVA);  $0 \leq p < 0.001$ , \*\*\*;  $0.001 \leq p < 0.01$ , \*\*;  $0.01 \leq p < 0.05$ , \*;  $p \geq 0.05$ , ns. The influence on the quantitative variable was calculated from the interaction between cell line (H9, iPSCs#1 iPSCs#2, and iPSCs#3) and Matrigel condition (Drop, MG<sup>+D</sup>; Liq, MG<sup>+L</sup>; Null, exECM<sup>-</sup>).

| Figure and data                                    | Comparison           |           | Mean difference | Lower range | Upper range | Adj. p-val. |     |
|----------------------------------------------------|----------------------|-----------|-----------------|-------------|-------------|-------------|-----|
| Fig. 2F: number of rosettes / section D13          | All lines: Liq-Drop  |           | 1.807692        | -0.04706    | 3.662443    | 0.057773    | ns  |
|                                                    | All lines: Null-Drop |           | -9.68462        | -11.4892    | -7.88       | 3.08E-10    | *** |
|                                                    | All lines: Null-Liq  |           | -11.4923        | -13.095     | -9.88962    | 3.08E-10    | *** |
| Appendix Fig. S2: number of rosettes / section D13 | H9 ESCs              | Liq-Drop  | -0.925          | -5.81414    | 3.964136    | 0.999966    | ns  |
|                                                    | H9 ESCs              | Null-Drop | -11.6571        | -15.9247    | -7.38955    | 3.09E-10    | *** |
|                                                    | H9 ESCs              | Null-Liq  | -10.7321        | -15.3003    | -6.16396    | 6.29E-10    | *** |
|                                                    | iPSCs#1              | Liq-Drop  | 3.1             | -2.22262    | 8.422617    | 0.724825    | ns  |
|                                                    | iPSCs#1              | Null-Drop | -6.375          | -11.9415    | -0.80847    | 0.011356    | *   |
|                                                    | iPSCs#1              | Null-Liq  | -9.475          | -14.3641    | -4.58586    | 2.31E-07    | *** |
|                                                    | iPSCs#2              | Liq-Drop  | 2.5             | -3.14549    | 8.145488    | 0.941835    | ns  |
|                                                    | iPSCs#2              | Null-Drop | -7.4            | -13.1491    | -1.65092    | 0.002195    | **  |
|                                                    | iPSCs#2              | Null-Liq  | -9.9            | -14.6358    | -5.16417    | 2.13E-08    | *** |
|                                                    | iPSCs#3              | Liq-Drop  | 1.654545        | -3.90475    | 7.213838    | 0.99746     | ns  |
|                                                    | iPSCs#3              | Null-Drop | -13.8           | -19.1699    | -8.43007    | 3.17E-10    | *** |
|                                                    | iPSCs#3              | Null-Liq  | -15.4545        | -19.6074    | -11.3017    | 3.08E-10    | *** |

| Figure and data                                    | Comparison           |           | Mean difference | Lower range | Upper range | Adj. p-val. |     |
|----------------------------------------------------|----------------------|-----------|-----------------|-------------|-------------|-------------|-----|
| Fig. 2F: number of rosettes / section D16          | All lines: Liq-Drop  |           | 2.672587        | 0.058384    | 5.286789    | 0.043854    | *   |
|                                                    | All lines: Null-Drop |           | -9.94048        | -12.5392    | -7.34172    | 5.33E-14    | *** |
|                                                    | All lines: Null-Liq  |           | -12.6131        | -14.8474    | -10.3787    | 2.31E-14    | *** |
| Appendix Fig. S2: number of rosettes / section D16 | H9 ESCs              | Liq-Drop  | 3.638889        | -2.86376    | 10.14153    | 0.782386    | ns  |
|                                                    | H9 ESCs              | Null-Drop | -9.83333        | -16.0023    | -3.66438    | 2.69E-05    | *** |
|                                                    | H9 ESCs              | Null-Liq  | -13.4722        | -18.9127    | -8.03172    | 6.23E-12    | *** |
|                                                    | iPSCs#1              | Liq-Drop  | 5.233333        | -2.40555    | 12.87221    | 0.498767    | ns  |
|                                                    | iPSCs#1              | Null-Drop | -4.1            | -12.3765    | 4.176517    | 0.889129    | ns  |
|                                                    | iPSCs#1              | Null-Liq  | -9.33333        | -16.4566    | -2.21004    | 0.001462    | **  |
|                                                    | iPSCs#2              | Liq-Drop  | 1.296703        | -6.88325    | 9.476653    | 0.999995    | ns  |
|                                                    | iPSCs#2              | Null-Drop | -11.3571        | -19.4342    | -3.28009    | 0.000407    | *** |
|                                                    | iPSCs#2              | Null-Liq  | -12.6538        | -19.3744    | -5.93333    | 2.66E-07    | *** |
|                                                    | iPSCs#3              | Liq-Drop  | 0.844444        | -6.51246    | 8.201348    | 1           | ns  |
|                                                    | iPSCs#3              | Null-Drop | -14.1556        | -21.5125    | -6.79865    | 1.33E-07    | *** |
|                                                    | iPSCs#3              | Null-Liq  | -15             | -21.3713    | -8.62873    | 6.08E-11    | *** |

| Figure and data                                    | Comparison           |           | Mean difference | Lower range | Upper range | Adj. p-val. |     |
|----------------------------------------------------|----------------------|-----------|-----------------|-------------|-------------|-------------|-----|
| Fig. 2F: number of rosettes / section D20          | All lines: Liq-Drop  |           | 4.350941        | 0.683021    | 8.018862    | 0.015553    | *   |
|                                                    | All lines: Null-Drop |           | 0.17963         | -3.49766    | 3.856916    | 0.992641    | ns  |
|                                                    | All lines: Null-Liq  |           | -4.17131        | -7.05652    | -1.2861     | 0.002324    | **  |
| Appendix Fig. S2: number of rosettes / section D20 | H9 ESCs              | Liq-Drop  | 4.179487        | -4.43373    | 12.7927     | 0.901146    | ns  |
|                                                    | H9 ESCs              | Null-Drop | 4.458333        | -4.24668    | 13.16335    | 0.863703    | ns  |
|                                                    | H9 ESCs              | Null-Liq  | 0.278846        | -6.02538    | 6.583075    | 1           | ns  |
|                                                    | iPSCs#1              | Liq-Drop  | 1.269841        | -9.95368    | 12.49336    | 1           | ns  |
|                                                    | iPSCs#1              | Null-Drop | 1.78E-15        | -10.4986    | 10.49864    | 1           | ns  |
|                                                    | iPSCs#1              | Null-Liq  | -1.26984        | -12.4934    | 9.953676    | 1           | ns  |
|                                                    | iPSCs#2              | Liq-Drop  | 0.2             | -11.3007    | 11.70068    | 1           | ns  |
|                                                    | iPSCs#2              | Null-Drop | 0.636364        | -10.6666    | 11.93931    | 1           | ns  |
|                                                    | iPSCs#2              | Null-Liq  | 0.436364        | -9.29453    | 10.16725    | 1           | ns  |
|                                                    | iPSCs#3              | Liq-Drop  | 6.333333        | -7.55506    | 20.22173    | 0.933532    | ns  |
|                                                    | iPSCs#3              | Null-Drop | -7.8125         | -21.8243    | 6.199349    | 0.784591    | ns  |
|                                                    | iPSCs#3              | Null-Liq  | -14.1458        | -21.798     | -6.4937     | 5.31E-07    | *** |

| Figure and data                           | Comparison           |           | Mean difference | Lower range | Upper range | Adj. p-val. |     |
|-------------------------------------------|----------------------|-----------|-----------------|-------------|-------------|-------------|-----|
| Fig. 4E: organoid diameter D40            | All lines: Liq-Drop  |           | -701.48         | -845.905    | -557.055    | 9.77E-14    | *** |
|                                           | All lines: Null-Drop |           | -945.449        | -1084.7     | -806.195    | 9E-14       | *** |
|                                           | All lines: Null-Liq  |           | -243.969        | -383.687    | -104.25     | 0.000155    | *** |
| Appendix Fig. S13A: organoid diameter D40 | H9 ESCs              | Liq-Drop  | -784.444        | -1225.04    | -343.846    | 9.02E-07    | *** |
|                                           | H9 ESCs              | Null-Drop | -1156.16        | -1596.76    | -715.565    | 2.53E-13    | *** |
|                                           | H9 ESCs              | Null-Liq  | -371.719        | -825.09     | 81.65228    | 0.229743    | ns  |
|                                           | iPSCs#1              | Liq-Drop  | -164.933        | -690.268    | 360.4022    | 0.996702    | ns  |
|                                           | iPSCs#1              | Null-Drop | -573.515        | -1076.49    | -70.5454    | 0.011135    | *   |
|                                           | iPSCs#1              | Null-Liq  | -408.583        | -933.918    | 116.7525    | 0.304588    | ns  |
|                                           | iPSCs#2              | Liq-Drop  | -569.957        | -1016.61    | -123.303    | 0.002083    | **  |
|                                           | iPSCs#2              | Null-Drop | -831.263        | -1277.92    | -384.609    | 2.17E-07    | *** |
|                                           | iPSCs#2              | Null-Liq  | -261.306        | -701.14     | 178.5286    | 0.71929     | ns  |
|                                           | iPSCs#3              | Liq-Drop  | -875.703        | -1182.36    | -569.043    | 2.06E-13    | *** |
|                                           | iPSCs#3              | Null-Drop | -1015.06        | -1303.77    | -726.36     | 1.11E-13    | *** |
| iPSCs#3                                   | Null-Liq             | -139.36   | -423.373        | 144.6522    | 0.900461    | ns          |     |

| Figure and data                           | Comparison           |           | Mean difference | Lower range | Upper range | Adj. p-val. |     |
|-------------------------------------------|----------------------|-----------|-----------------|-------------|-------------|-------------|-----|
| Fig. 4F: mean rosette area D40            | All lines: Liq-Drop  |           | -0.01873        | -0.02327    | -0.01418    | 3.29E-14    | *** |
|                                           | All lines: Null-Drop |           | -0.02589        | -0.03039    | -0.0214     | 3.11E-15    | *** |
|                                           | All lines: Null-Liq  |           | -0.00717        | -0.01151    | -0.00282    | 0.000398    | *** |
| Appendix Fig. S13B: mean rosette area D40 | H9 ESCs              | Liq-Drop  | -0.00822        | -0.02227    | 0.005818    | 0.732574    | ns  |
|                                           | H9 ESCs              | Null-Drop | -0.01499        | -0.02839    | -0.00159    | 0.014429    | *   |
|                                           | H9 ESCs              | Null-Liq  | -0.00677        | -0.01986    | 0.006333    | 0.861132    | ns  |
|                                           | iPSCs#1              | Liq-Drop  | -0.02555        | -0.04219    | -0.00891    | 5.8E-05     | *** |
|                                           | iPSCs#1              | Null-Drop | -0.03458        | -0.05027    | -0.01889    | 6.05E-10    | *** |
|                                           | iPSCs#1              | Null-Liq  | -0.00903        | -0.02567    | 0.007615    | 0.817901    | ns  |
|                                           | iPSCs#2              | Liq-Drop  | -0.00435        | -0.01712    | 0.008419    | 0.993016    | ns  |
|                                           | iPSCs#2              | Null-Drop | -0.01681        | -0.02957    | -0.00404    | 0.001295    | **  |
|                                           | iPSCs#2              | Null-Liq  | -0.01246        | -0.02415    | -0.00076    | 0.025815    | *   |
|                                           | iPSCs#3              | Liq-Drop  | -0.02991        | -0.04007    | -0.01975    | 1.21E-13    | *** |
|                                           | iPSCs#3              | Null-Drop | -0.03384        | -0.04419    | -0.02349    | 8.37E-14    | *** |
| iPSCs#3                                   | Null-Liq             | -0.00393  | -0.01386        | 0.005997    | 0.976648    | ns          |     |

| Figure and data                                         | Comparison           |           | Mean difference | Lower range | Upper range | Adj. p-val. |     |
|---------------------------------------------------------|----------------------|-----------|-----------------|-------------|-------------|-------------|-----|
| Fig. 4G: mean rosette number per section D40            | All lines: Liq-Drop  |           | 6.110504        | 2.719573    | 9.501434    | 9.81E-05    | *** |
|                                                         | All lines: Null-Drop |           | 6.166103        | 2.810302    | 9.521904    | 6.98E-05    | *** |
|                                                         | All lines: Null-Liq  |           | 0.0556          | -3.18591    | 3.297113    | 0.999094    | ns  |
| Appendix Fig. S13C: mean rosette number per section D40 | H9 ESCs              | Liq-Drop  | 8.470085        | -2.01309    | 18.95326    | 0.247052    | ns  |
|                                                         | H9 ESCs              | Null-Drop | 0.069444        | -9.93086    | 10.06975    | 1           | ns  |
|                                                         | H9 ESCs              | Null-Liq  | -8.40064        | -18.1787    | 1.37741     | 0.170478    | ns  |
|                                                         | iPSCs#1              | Liq-Drop  | 12.8625         | 0.440938    | 25.28406    | 0.035149    | *   |
|                                                         | iPSCs#1              | Null-Drop | 7.423333        | -4.28783    | 19.13449    | 0.623851    | ns  |
|                                                         | iPSCs#1              | Null-Liq  | -5.43917        | -17.8607    | 6.982396    | 0.951473    | ns  |
|                                                         | iPSCs#2              | Liq-Drop  | 7.639316        | -1.89211    | 17.17074    | 0.258153    | ns  |
|                                                         | iPSCs#2              | Null-Drop | 9.296724        | -0.2347     | 18.82815    | 0.063227    | ns  |
|                                                         | iPSCs#2              | Null-Liq  | 1.657407        | -7.07158    | 10.38639    | 0.999971    | ns  |
|                                                         | iPSCs#3              | Liq-Drop  | 3.020396        | -4.56551    | 10.6063     | 0.975691    | ns  |
|                                                         | iPSCs#3              | Null-Drop | 8.715909        | 0.986489    | 16.44533    | 0.013092    | *   |
| iPSCs#3                                                 | Null-Liq             | 5.695513  | -1.71721        | 13.10823    | 0.319646    | ns          |     |

| Figure and data                     | Comparison           |  | Mean difference | Lower range | Upper range | Adj. p-val. |     |
|-------------------------------------|----------------------|--|-----------------|-------------|-------------|-------------|-----|
| Fig. 4F: OTX2 <sup>+</sup> area D40 | All lines: Liq-Drop  |  | -8.35492        | -14.3973    | -2.31252    | 0.003701    | **  |
|                                     | All lines: Null-Drop |  | -16.725         | -22.7043    | -10.7458    | 1.27E-09    | *** |
|                                     | All lines: Null-Liq  |  | -8.37011        | -14.173     | -2.56725    | 0.002313    | **  |

|                                                |           |           |          |          |          |          |     |
|------------------------------------------------|-----------|-----------|----------|----------|----------|----------|-----|
| Appendix Fig. S13D: OTX2 <sup>+</sup> area D40 | H9 ESCs   | Liq-Drop  | -11.7291 | -30.4953 | 7.037044 | 0.644639 | ns  |
|                                                | H9 ESCs   | Null-Drop | -13.5799 | -31.4816 | 4.321929 | 0.339277 | ns  |
|                                                | H9 ESCs   | Null-Liq  | -1.85073 | -19.3546 | 15.65318 | 1        | ns  |
|                                                | iPSCs#1   | Liq-Drop  | -7.40224 | -29.6384 | 14.83389 | 0.994253 | ns  |
|                                                | iPSCs#1   | Null-Drop | -8.83626 | -29.8007 | 12.12816 | 0.963001 | ns  |
|                                                | iPSCs#1   | Null-Liq  | -1.43402 | -23.6701 | 20.80211 | 1        | ns  |
|                                                | iPSCs#2   | Liq-Drop  | -21.2544 | -38.3169 | -4.192   | 0.003208 | **  |
|                                                | iPSCs#2   | Null-Drop | -29.4243 | -46.4868 | -12.3619 | 2.97E-06 | *** |
|                                                | iPSCs#2   | Null-Liq  | -8.16991 | -23.7959 | 7.456046 | 0.851193 | ns  |
|                                                | iPSCs#3   | Liq-Drop  | -0.45795 | -13.8768 | 12.9609  | 1        | ns  |
| iPSCs#3                                        | Null-Drop | -14.1598  | -27.8386 | -0.481   | 0.035266 | *        |     |
| iPSCs#3                                        | Null-Liq  | -13.7018  | -26.9715 | -0.43214 | 0.036207 | *        |     |

| Figure and data                                            | Comparison                      | Mean difference | Lower range | Upper range | Adj. p-val. |          |     |
|------------------------------------------------------------|---------------------------------|-----------------|-------------|-------------|-------------|----------|-----|
| Fig. 5J: %FOXG1 <sup>+</sup> /OTX2 <sup>+</sup> areas D120 | All lines: Liq-Drop             | -3.2781         | -5.22179    | -1.33442    | 0.000345    | ***      |     |
|                                                            | All lines: Null-Drop            | -3.42248        | -5.13665    | -1.70832    | 2.08E-05    | ***      |     |
|                                                            | All lines: Null-Liq             | -0.14438        | -1.9305     | 1.641741    | 0.979797    | ns       |     |
|                                                            | All conditions: H9 ESCs-iPSCs#1 | -1.07702        | -3.28318    | 1.129127    | 0.580094    | ns       |     |
|                                                            | All conditions: H9 ESCs-iPSCs#2 | 1.131396        | -0.96833    | 3.231119    | 0.496984    | ns       |     |
|                                                            | All conditions: H9 ESCs-iPSCs#3 | -0.86912        | -3.30394    | 1.565702    | 0.787057    | ns       |     |
|                                                            | All conditions: iPSCs#1-iPSCs#2 | 2.20842         | 0.067705    | 4.349136    | 0.040498    | *        |     |
|                                                            | All conditions: iPSCs#1-iPSCs#3 | 0.207906        | -2.26235    | 2.678165    | 0.996214    | ns       |     |
|                                                            | All conditions: iPSCs#2-iPSCs#3 | -2.00051        | -4.37621    | 0.375177    | 0.130116    | ns       |     |
|                                                            | H9 ESCs                         | Liq-Drop        | -4.4824     | -10.363     | 1.39823     | 0.320851 | ns  |
|                                                            | H9 ESCs                         | Null-Drop       | -4.49332    | -9.55334    | 0.566702    | 0.13243  | ns  |
|                                                            | H9 ESCs                         | Null-Liq        | -0.01092    | -4.80088    | 4.779034    | 1        | ns  |
|                                                            | iPSCs#1                         | Liq-Drop        | 0.86442     | -4.2717     | 6.000536    | 0.99999  | ns  |
|                                                            | iPSCs#1                         | Null-Drop       | 0.067681    | -4.78892    | 4.924279    | 1        | ns  |
|                                                            | iPSCs#1                         | Null-Liq        | -0.79674    | -5.81055    | 4.217071    | 0.999994 | ns  |
|                                                            | iPSCs#2                         | Liq-Drop        | -7.1034     | -12.0149    | -2.19192    | 0.000292 | *** |
|                                                            | iPSCs#2                         | Null-Drop       | -6.92347    | -11.1823    | -2.66468    | 2.49E-05 | *** |
|                                                            | iPSCs#2                         | Null-Liq        | 0.179931    | -4.50474    | 4.864601    | 1        | ns  |
| iPSCs#3                                                    | Liq-Drop                        | -1.286          | -7.68648    | 5.114475    | 0.999938    | ns       |     |
| iPSCs#3                                                    | Null-Drop                       | -1.0532         | -6.76167    | 4.655274    | 0.999974    | ns       |     |
| iPSCs#3                                                    | Null-Liq                        | 0.232803        | -5.79305    | 6.258653    | 1           | ns       |     |

| Figure and data                                             | Comparison                      | Mean difference | Lower range | Upper range | Adj. p-val. |          |    |
|-------------------------------------------------------------|---------------------------------|-----------------|-------------|-------------|-------------|----------|----|
| Fig. 5K: %SATB2 <sup>+</sup> /DLX2 <sup>+</sup> nuclei D120 | All lines: Liq-Drop             | -1.48882        | -8.77696    | 5.79933     | 0.87757     | ns       |    |
|                                                             | All lines: Null-Drop            | 0.92519         | -5.65456    | 7.504939    | 0.939936    | ns       |    |
|                                                             | All lines: Null-Liq             | 2.414005        | -4.30836    | 9.136366    | 0.66906     | ns       |    |
|                                                             | All conditions: H9 ESCs-iPSCs#1 | -17.9547        | -26.1807    | -9.72863    | 9.06E-07    | ***      |    |
|                                                             | All conditions: H9 ESCs-iPSCs#2 | 4.254357        | -3.68739    | 12.1961     | 0.500644    | ns       |    |
|                                                             | All conditions: H9 ESCs-iPSCs#3 | -0.48987        | -10.1308    | 9.151043    | 0.999151    | ns       |    |
|                                                             | All conditions: iPSCs#1-iPSCs#2 | 22.20902        | 14.18729    | 30.23074    | 1.26E-09    | ***      |    |
|                                                             | All conditions: iPSCs#1-iPSCs#3 | 17.46479        | 7.757888    | 27.17169    | 5.43E-05    | ***      |    |
|                                                             | All conditions: iPSCs#2-iPSCs#3 | -4.74423        | -14.2114    | 4.722962    | 0.557299    | ns       |    |
|                                                             | H9 ESCs                         | Liq-Drop        | -7.45806    | -28.817     | 13.90085    | 0.989688 | ns |
|                                                             | H9 ESCs                         | Null-Drop       | -6.90264    | -25.6356    | 11.83035    | 0.984187 | ns |
|                                                             | H9 ESCs                         | Null-Liq        | 0.555414    | -17.2163    | 18.32709    | 1        | ns |
|                                                             | iPSCs#1                         | Liq-Drop        | 4.303088    | -14.3517    | 22.95787    | 0.999747 | ns |
|                                                             | iPSCs#1                         | Null-Drop       | 8.527653    | -9.57014    | 26.62545    | 0.91049  | ns |
|                                                             | iPSCs#1                         | Null-Liq        | 4.224565    | -14.4302    | 22.87934    | 0.999789 | ns |
|                                                             | iPSCs#2                         | Liq-Drop        | -2.57959    | -20.7901    | 15.63097    | 0.999998 | ns |
|                                                             | iPSCs#2                         | Null-Drop       | 0.012746    | -16.4254    | 16.45088    | 1        | ns |
|                                                             | iPSCs#2                         | Null-Liq        | 2.592333    | -14.9308    | 20.11545    | 0.999997 | ns |
| iPSCs#3                                                     | Liq-Drop                        | -3.21546        | -30.3622    | 23.93123    | 1           | ns       |    |
| iPSCs#3                                                     | Null-Drop                       | -7.72416        | -31.7871    | 16.33881    | 0.994868    | ns       |    |
| iPSCs#3                                                     | Null-Liq                        | -4.5087         | -28.5717    | 19.55427    | 0.999968    | ns       |    |

**Appendix Table S2. Medium composition for telencephalic organoid culture.** Medium components and recipe for 500 mL of Neural Induction medium (NI), Differentiation medium without vitamin A (Diff-A), and Differentiation medium with Vitamin A (Diff+A). All media were vacuum-filtered through a membrane with a pore size of 0.22  $\mu\text{m}$ .

| Medium                        | Components                                   | Manufacturer            | Catalog number | Recipe for 500 mL |
|-------------------------------|----------------------------------------------|-------------------------|----------------|-------------------|
| <b>Neural induction</b>       | DMEM/F12(1:1) 1x, with HEPES                 | ThermoFisher Scientific | 11330057       | 500 mL            |
|                               | N-2 Supplement (100X)                        | ThermoFisher Scientific | 17502048       | 5 mL              |
|                               | GlutaMAX supplement-I (100X)                 | ThermoFisher Scientific | 35050-038      | 5 mL              |
|                               | MEM Non-essential amino acid solution (100X) | ThermoFisher Scientific | 11140050       | 5 mL              |
|                               | Antibiotic-Antimycotic (100X)                | ThermoFisher Scientific | 15240062       | 5 mL              |
|                               | Heparin solution (1 mg/mL in DPBS-/-)        | Merck                   | H3149          | 500 $\mu\text{L}$ |
| <b>Diff. medium - vit. A</b>  | DMEM/F12(1:1) 1x, with HEPES                 | ThermoFisher Scientific | 11330057       | 250 mL            |
|                               | Neurobasal Medium                            | ThermoFisher Scientific | 21103049       | 250 mL            |
|                               | N-2 Supplement (100X)                        | ThermoFisher Scientific | 17502048       | 2.5 mL            |
|                               | B-27 Supplement (50X), minus vitamin A       | ThermoFisher Scientific | 12587010       | 10 mL             |
|                               | Recombinant human Insulin solution           | Merck                   | I9278          | 125 $\mu\text{L}$ |
|                               | GlutaMAX supplement-I (100X)                 | ThermoFisher Scientific | 35050-038      | 5 mL              |
|                               | MEM Non-essential amino acid solution (100X) | ThermoFisher Scientific | 11140050       | 2.5 mL            |
| Antibiotic-Antimycotic (100X) | ThermoFisher Scientific                      | 15240062                | 5 mL           |                   |
| <b>Diff. medium + vit. A</b>  | DMEM/F12(1:1) 1x, with HEPES                 | ThermoFisher Scientific | 11330057       | 250 mL            |
|                               | Neurobasal Medium                            | ThermoFisher Scientific | 21103049       | 250 mL            |
|                               | N-2 Supplement (100X)                        | ThermoFisher Scientific | 17502048       | 2.5 mL            |
|                               | B-27 Supplement (50X), serum free            | ThermoFisher Scientific | 17504044       | 10 mL             |
|                               | Recombinant human Insulin solution           | Merck                   | I9278          | 125 $\mu\text{L}$ |
|                               | GlutaMAX supplement-I (100X)                 | ThermoFisher Scientific | 35050-038      | 5 mL              |
|                               | MEM Non-essential amino acid solution (100X) | ThermoFisher Scientific | 11140050       | 2.5 mL            |
|                               | Antibiotic-Antimycotic (100X)                | ThermoFisher Scientific | 15240062       | 5 mL              |
| Sodium bicarbonate            | Merck                                        | S5761                   | 1 g            |                   |

**Appendix Table S3. Antibodies used in this study.**

| Primary antibodies |                  |                          |             |
|--------------------|------------------|--------------------------|-------------|
| Species            | Antigen          | Manufacturer             | Catalog#    |
| Chicken            | GFP              | Aves Labs                | GFP-1020    |
| Mouse              | PKC $\zeta$      | Santa Cruz Biotechnology | sc-17781    |
| Rabbit             | PKC $\zeta$      | Santa Cruz Biotechnology | sc-216      |
| Mouse              | Ms/h-Fibronectin | R&D Systems              | MAB1918     |
| Mouse              | Ms/h-Perlecan    | Invitrogen               | 13-4400     |
| Rabbit             | Ms/h-LAMA1       | Abcam                    | ab11575     |
| Rat                | Ms-LAMA1         | R&D Systems              | MAB4656     |
| Rabbit             | Lumican          | Abcam                    | ab168348    |
| Mouse              | SOX2             | R&D Systems              | MAB2018     |
| Goat               | SOX2             | R&D Systems              | AF2018      |
| Chicken            | MAP2             | Thermo Fisher Scientific | PA1-10005   |
| Rabbit             | TBR2             | Abcam                    | ab23345     |
| Sheep              | TBR2             | R&D Systems              | AF6166      |
| Rat                | CTIP2            | Abcam                    | ab18465     |
| Mouse              | SATB2            | Abcam                    | ab51502     |
| Goat               | OTX2             | Neuromics                | GT15095     |
| Sheep              | TTR              | AbD Serotec              | ahp 1837    |
| Mouse              | DLX2             | Santa Cruz Biotechnology | sc-393879   |
| Rabbit             | SCGN             | Sigma-Aldrich            | HPA006641   |
| Mouse              | COUP-TFII        | R&D Systems              | pp-h7147-00 |

| Secondary antibodies                |                        |             |  |
|-------------------------------------|------------------------|-------------|--|
| Antibody                            | Manufacturer           | Catalog#    |  |
| Alexa Fluor 488 Donkey anti-rabbit  | Invitrogen             | A21206      |  |
| Alexa Fluor 488 Donkey anti-mouse   | Invitrogen             | A21202      |  |
| Alexa Fluor 488 Donkey anti-chicken | Jackson ImmunoResearch | 703-545-155 |  |
| Alexa Fluor 488 Donkey anti-goat    | Invitrogen             | A11055      |  |
| Alexa Fluor 568 Donkey anti-rabbit  | Invitrogen             | A10042      |  |
| Alexa Fluor 568 Donkey anti-mouse   | Invitrogen             | A10037      |  |
| Alexa Fluor 568 Donkey anti-goat    | Invitrogen             | A11057      |  |
| Alexa Fluor 647 Donkey anti-rabbit  | Invitrogen             | A31573      |  |
| Alexa Fluor 647 Donkey anti-mouse   | Invitrogen             | A31571      |  |
| Alexa Fluor 647 Donkey anti-goat    | Invitrogen             | A21447      |  |
| Alexa Fluor 647 Donkey anti-rat     | Jackson ImmunoResearch | 712-605-150 |  |
